# Supplementary material for: Tuning the redox profile of the 6,6′-biazulenic platform through functionalization along its molecular axis
Source: Royal Society of Chemistry journal article supplement (doi:10.1039/d4cc00656a), 2024-01-01
Supplement: d4cc00656a1.pdf [file d4cc00656a1.pdf]

## Supporting Information for:

### Tuning the redox profile of the 6,6'-biazulenic platform through functionalization along its molecular axis

*Shaun R. Kelsey,<sup>a</sup> Georgii Griaznov,<sup>a</sup> Andrew D. Spaeth,<sup>a</sup> Daron E. Janzen,<sup>b</sup> Justin T. Douglas,<sup>c</sup>  
Ward H. Thompson<sup>a</sup> and Mikhail V. Barybin<sup>\*, a</sup>*

<sup>a</sup> Department of Chemistry, University of Kansas, 1567 Irving Hill Road,  
Lawrence, Kansas 66045, United States

<sup>b</sup> Department of Chemistry and Biochemistry, St. Catherine University, St. Paul, MN  
55105, USA

<sup>c</sup> NMR Laboratory, Molecular Structures Group, University of Kansas, Lawrence, KS  
66045, USA

\* To whom correspondence should be addressed. E-mail: mbarybin@ku.edu  
(M.V.B.)

# Table of Contents

## **A. Synthetic procedures**

|                                                                                                                 |     |
|-----------------------------------------------------------------------------------------------------------------|-----|
| A1. General Procedures, Starting Materials, and Equipment                                                       | S-4 |
| A2. Synthesis of 1,1',3,3'-tetraethoxycarbonyl-6,6'-biazulene ( <b>1</b> )                                      | S-5 |
| A3. Synthesis of 2,2'-dichloro-1,1',3,3'-tetraethoxycarbonyl-6,6'-biazulene ( <b>3a</b> )                       | S-6 |
| <b>Scheme S1.</b> Two alternative routes to <b>3a</b> starting from 2-amino-6-bromo-1,3-diethoxycarbonylazulene | S-7 |
| A4. Synthesis of 2-chloro-1,1',3,3'-tetraethoxycarbonyl-6,6'-biazulene ( <b>3b</b> )                            | S-8 |

## **B. NMR spectra**

|                                                                                                            |      |
|------------------------------------------------------------------------------------------------------------|------|
| <b>Figure S1.</b> <sup>1</sup> H NMR (400 MHz, CDCl <sub>3</sub> ) spectrum of <b>1</b>                    | S-9  |
| <b>Figure S2.</b> <sup>1</sup> H NMR (500 MHz, CDCl <sub>3</sub> ) spectrum of <b>3a</b>                   | S-10 |
| <b>Figure S3.</b> <sup>13</sup> C{ <sup>1</sup> H} NMR (126 MHz, CDCl <sub>3</sub> ) spectrum of <b>3a</b> | S-11 |
| <b>Figure S4.</b> HSQC NMR (600 MHz, CDCl <sub>3</sub> ) spectrum of <b>3a</b>                             | S-12 |
| <b>Figure S5.</b> HMBC NMR (500 MHz, CDCl <sub>3</sub> ) spectrum of <b>3a</b>                             | S-13 |
| <b>Figure S6.</b> 1,1-ADEQUATE NMR (600 MHz, CDCl <sub>3</sub> ) spectrum of <b>3a</b>                     | S-14 |
| <b>Figure S7.</b> <sup>1</sup> H NMR (500 MHz, CDCl <sub>3</sub> ) spectrum of <b>3b</b>                   | S-15 |
| <b>Figure S8.</b> <sup>13</sup> C{ <sup>1</sup> H} NMR (126 MHz, CDCl <sub>3</sub> ) spectrum of <b>3b</b> | S-16 |

## **C. Electronic absorption spectra**

|                                                                                                |      |
|------------------------------------------------------------------------------------------------|------|
| <b>Figure S9.</b> Electronic absorption spectrum of <b>1</b>                                   | S-17 |
| <b>Figure S10.</b> Electronic absorption spectrum of <b>3a</b>                                 | S-17 |
| <b>Figure S11.</b> Electronic absorption spectrum of <b>3b</b>                                 | S-18 |
| <b>Table S1.</b> Summary of the UV vis data for compounds <b>1</b> , <b>3a</b> , and <b>3b</b> | S-18 |

## **D. Computational work**

|                                                                                                                                                       |      |
|-------------------------------------------------------------------------------------------------------------------------------------------------------|------|
| D1. Calculation Details                                                                                                                               | S-19 |
| <b>Table S2.</b> Coordinates of 6,6'-biazulene used in generating the HOMO/LUMO plots in Fig. 1.                                                      | S-20 |
| <b>Table S3.</b> Coordinates of <b>3a</b> used to simulate the UV-vis spectrum in Figure S12.                                                         | S-21 |
| <b>Table S4.</b> Transition wavelengths, oscillator strengths, and transition orbital amplitudes obtained from the TD-DFT/B3LYP/cc-pVDZ calculations. | S-23 |
| <b>Figure S12.</b> Experimental vs. TD-DFT simulated electronic spectra of <b>3a</b>                                                                  | S-24 |

## **E. Electrochemistry**

|                                                                                       |      |
|---------------------------------------------------------------------------------------|------|
| <b>Figure S13.</b> Cyclic voltammogram and scan rate dependence data for <b>1</b>     | S-25 |
| <b>Figure S14.</b> Cyclic voltammogram and scan rate dependence data for <b>2b</b>    | S-25 |
| <b>Figure S15.</b> Cyclic voltammogram and scan rate dependence data for <b>3a</b>    | S-26 |
| <b>Figure S16.</b> Cyclic voltammogram and scan rate dependence data for <b>3b</b>    | S-26 |
| <b>Figure S17.</b> Cyclic voltammogram for 1,3-diethoxycarbonylazulene                | S-27 |
| <b>Figure S18.</b> Cyclic voltammogram for 2-amino-1,3-diethoxycarbonylazulene        | S-27 |
| <b>Figure S19.</b> Cyclic voltammogram for 2-chloro-1,3-diethoxycarbonylazulene       | S-28 |
| <b>Figure S20.</b> Cyclic voltammogram for 2-isocyano-1,3-diethoxycarbonylazulene     | S-28 |
| <b>Table S5.</b> E <sub>1/2</sub> potentials and σ <sub>p</sub> parameters for Fig. 4 | S-29 |
| <b>Table S6.</b> E <sub>1/2</sub> potentials and σ <sub>p</sub> parameters for Fig. 5 | S-29 |

## F. X-ray crystallographic studies

|                                                                                                                                                                  |      |
|------------------------------------------------------------------------------------------------------------------------------------------------------------------|------|
| F1. Experimental and Refinement Model Description                                                                                                                | S-30 |
| <b>Figure S21.</b> Crystals of <b>3a</b>                                                                                                                         | S-30 |
| <b>Table S7.</b> Crystal data and structure refinement for <b>3a</b> .                                                                                           | S-31 |
| <b>Table S8.</b> Fractional Atomic Coordinates ( $\times 10^4$ ) and Equivalent Isotropic Displacement Parameters ( $\text{\AA}^2 \times 10^3$ ) for <b>3a</b> . | S-32 |
| <b>Table S9.</b> Anisotropic Displacement Parameters ( $\text{\AA}^2 \times 10^3$ ) for <b>3a</b> .                                                              | S-33 |
| <b>Table S10.</b> Bond Lengths for <b>3a</b> .                                                                                                                   | S-34 |
| <b>Table S11.</b> Bond Angles for <b>3a</b> .                                                                                                                    | S-35 |
| <b>Table S12.</b> Torsion Angles for <b>3a</b> .                                                                                                                 | S-36 |
| <b>Table S13.</b> Hydrogen Atom Coordinates ( $\text{\AA} \times 10^4$ ) and Isotropic Displacement Parameters ( $\text{\AA}^2 \times 10^3$ ) for <b>3a</b> .    | S-37 |
| <b>Figure S22.</b> Distribution of the C–Cl bond distances for chloroazulenes featuring Cl-substitution at the five-membered ring of their azulenic scaffold.    | S-38 |
| <b>Table S14.</b> X-ray crystallographically characterized chloroazulenes represented in Fig. 7.                                                                 | S-38 |
| <b>Figure S23.</b> The chlorodiphenylmethylium cation X-ray crystallographically characterized by Laube <i>et al.</i>                                            | S-40 |
| <b>References</b>                                                                                                                                                | S-41 |

# A. Synthetic procedures

## A1. General Procedures, Starting Materials, and Equipment

All synthetic operations were performed without protection from air. 2,2'-Diamino-1,1',3,3'-tetraethoxycarbonyl-6,6'-biazulene (**2a**),<sup>1</sup> 2-amino-1,1',3,3'-tetraethoxycarbonyl-6,6'-biazulene (**2b**),<sup>2</sup> 2,2'-diisocyano-1,1',3,3'-tetraethoxycarbonyl-6,6'-biazulene (**4a**),<sup>1</sup> 2-isocyano-1,1',3,3'-tetraethoxycarbonyl-6,6'-biazulene (**4b**),<sup>2</sup> 1,3-diethoxycarbonylazulene,<sup>3</sup> 2-amino-1,3-diethoxycarbonylazulene,<sup>4</sup> 2-chloro-1,3-diethoxycarbonylazulene,<sup>5</sup> and 2-isocyano-1,3-diethoxycarbonylazulene<sup>6</sup> were synthesized according to literature procedures. Other reagents and all solvents, including CDCl<sub>3</sub>, were obtained from commercial sources and used as received. Infrared spectra were recorded on a PerkinElmer Spectrum 100 FTIR spectrometer with liquid samples sealed in 0.1 mm NaCl cells. NMR samples were analyzed on Bruker Avance III HD 400 MHz, Avance III 500 MHz, or Bruker AVIII 600 MHz spectrometers. <sup>1</sup>H and <sup>13</sup>C NMR chemical shifts are given with reference to residual solvent resonances relative to SiMe<sub>4</sub>. Electronic spectra were recorded at 22±3 °C using a Shimadzu UV-3600 UV-Vis-NIR spectrophotometer or a Varian Cary 50 Bio spectrophotometer. Cyclic voltammetry experiments were conducted at room temperature using an EPSILON (Bioanalytical Systems Inc., West Lafayette, IN) electrochemical workstation inside a Vacuum Atmospheres dry box filled with argon. A solution of 0.1 M [<sup>n</sup>Bu<sub>4</sub>N][PF<sub>6</sub>] in CH<sub>2</sub>Cl<sub>2</sub> was used as the supporting electrolyte. A three-component system consisting of a glassy carbon working electrode, a platinum-wire auxiliary electrode, and a glass encased non-aqueous Ag/AgCl reference electrode was employed. The reported potentials were determined at a scan rate of 100 mV/s. Melting points are uncorrected and were determined for samples in sealed capillary tubes. Elemental analyses were carried out by Micro-Analysis, Inc., Wilmington, Delaware.

## A2. Synthesis of 1,1',3,3'-tetraethoxycarbonyl-6,6'-biazulene (1)

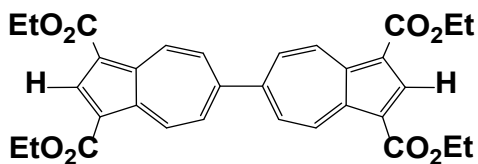

A solution composed of concentrated  $\text{H}_2\text{SO}_4$  (98%, 0.173 g), 10 mL of THF and 50 mL of 1,4-dioxane was added to a mixture of **2a** (0.200 g, 0.349 mmol) and *para*-hydroxyquinone (0.077 g, 0.699 mmol) with stirring. To the resulting reaction mixture, a solution of isoamyl nitrite (1.88 mL, 14.0 mmol) in 35 mL of 1,4-dioxane and a solution of *para*-hydroxyquinone (1.54 g, 14.0 mmol) in 35 mL of 1,4-dioxane were added dropwise under vigorous stirring using separate addition funnels. Once the addition was completed, the mixture was stirred for 3 hours and then quenched with 200 mL of 1M aqueous  $\text{Na}_2\text{SO}_3$ . After extraction with  $\text{CH}_2\text{Cl}_2$ , the combined organic layers were washed with deionized  $\text{H}_2\text{O}$  ( $3 \times 200$  mL) and dried over anhydrous  $\text{Na}_2\text{SO}_4$ . The drying agent was filtered off and the filtrate was concentrated to dryness under vacuum to afford a residue that was redissolved in a minimum amount of  $\text{CH}_2\text{Cl}_2$ . The resulting solution was layered with pentane and kept at  $-40$  °C until a red-brown precipitate formed. The solid was filtered off and dried at  $10^{-2}$  torr to give **1** (0.096 g, 0.177 mmol) in a 51% yield. Mp: 175 °C (dec.) [lit. 227.5-230 °C<sup>7</sup>]. The NMR and UV-vis spectroscopic signatures of this product were identical to those of bona fide **1** previously reported<sup>7</sup> by Ito *et al.* <sup>1</sup>H NMR ( $\text{CDCl}_3$ , 400 MHz, 22 °C):  $\delta$  9.89 (d, 4H,  $\text{H}^{4,4',8,8'}$ ,  $^3J_{\text{HH}} = 11$  Hz), 8.92 (s, 2H,  $\text{H}^{2,2'}$ ), 7.97 (d, 4H,  $\text{H}^{5,5',7,7'}$ ,  $^3J_{\text{HH}} = 11$  Hz), 4.48 (d, 8H,  $\text{CH}_2$ ,  $^3J_{\text{HH}} = 7$  Hz), 1.49 (t, 12H,  $\text{CH}_3$ ,  $^3J_{\text{HH}} = 7$  Hz), ppm. <sup>13</sup>C {<sup>1</sup>H} NMR ( $\text{CDCl}_3$ , 126 MHz, 22 °C):  $\delta$  165.0 (C=O), 156.0, 144.6, 143.1, 138.6, 131.4, 117.5 (aromatic C), 60.5 ( $\text{CH}_2$ ), 14.7 ( $\text{CH}_3$ ) ppm. UV-Vis [ $\text{CH}_2\text{Cl}_2$ ,  $\lambda_{\text{max}}$  ( $\epsilon \times 10^{-3} \text{ M}^{-1} \text{ cm}^{-1}$ ): 342 (63.58), 373 (47.06), 518 (2.24) nm.

### A3. Synthesis of 2,2'-dichloro-1,1',3,3'-tetraethoxycarbonyl-6,6'-biazulene (**3a**)

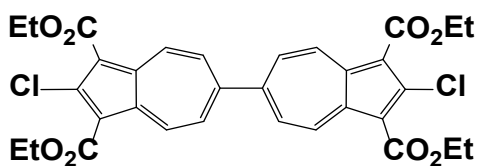

A red slurry consisting of **2a** (0.121 g, 0.211 mmol) and 12 M aqueous HCl (7 mL) was stirred at 22 °C for 15 minutes, then diluted with 7 mL of CHCl<sub>3</sub>. The biphasic red mixture was stirred for an additional 5 minutes before it was treated with isoamyl nitrite (0.14 mL, 1.0 mmol) in one portion. The reaction mixture was stirred for an additional 15 minutes, during which time it quickly darkened and turned into a dark slurry. Then, DMSO (15 mL) was added, and the reaction flask was equipped with a reflux condenser. The temperature was raised to 80 °C, and the opaque solution slowly turned dark red/purple as it was stirred for an hour and 45 minutes. After this time, deionized water (100 mL) was added, and the product was extracted with CHCl<sub>3</sub> (4 × 30 mL). The combined organic extracts were washed with deionized water (6×30 mL) and dried over anhydrous Na<sub>2</sub>SO<sub>4</sub>. The drying agent was filtered off and the filtrate was concentrated to dryness under reduced pressure to afford **3a** (0.110 g, 0.179 mmol) in an 85% yield. Further recrystallization of the product from CH<sub>2</sub>Cl<sub>2</sub>/pentane provided large metallic black crystals of **3a** (Figure S21a). Mp: 220-222 °C, [lit. 222-224 °C<sup>8</sup>]. Anal. Calcd for C<sub>32</sub>H<sub>28</sub>Cl<sub>2</sub>O<sub>8</sub>: C, 62.86; H, 4.62; Found: C, 62.98; H, 4.84. <sup>1</sup>H NMR (400 MHz, CDCl<sub>3</sub>): δ 9.60 (d, <sup>3</sup>J<sub>HH</sub> = 11.2 Hz, 4H, H<sup>4,4',8,8'</sup>), 7.93 (d, <sup>3</sup>J<sub>HH</sub> = 11.2 Hz, 4H, H<sup>5,5',7,7'</sup>), 4.52 (q, <sup>3</sup>J<sub>HH</sub> = 7.1 Hz, 8H, CH<sub>2</sub>), 1.50 (t, <sup>3</sup>J<sub>HH</sub> = 7.1 Hz, 12H, CH<sub>3</sub>) ppm. <sup>13</sup>C{<sup>1</sup>H} NMR (126 MHz, CDCl<sub>3</sub>): δ 164.26 (C=O), 155.05 (C<sup>6,6'</sup>), 144.78 (C<sup>2,2'</sup>), 140.87 (C<sup>9,9',10,10'</sup>), 137.27 (C<sup>4,4',8,8'</sup>), 131.81 (C<sup>5,5',7,7'</sup>), 116.56 (C<sup>1,1',3,3'</sup>), 61.06 (CH<sub>2</sub>), 14.57 (CH<sub>3</sub>) ppm. UV-Vis [CH<sub>2</sub>Cl<sub>2</sub>, λ<sub>max</sub> (ε × 10<sup>-3</sup> M<sup>-1</sup> cm<sup>-1</sup>): 340 (48.81), 368 (32.22), 396 (18.08), *ca.* 440-640 (1.06) nm.

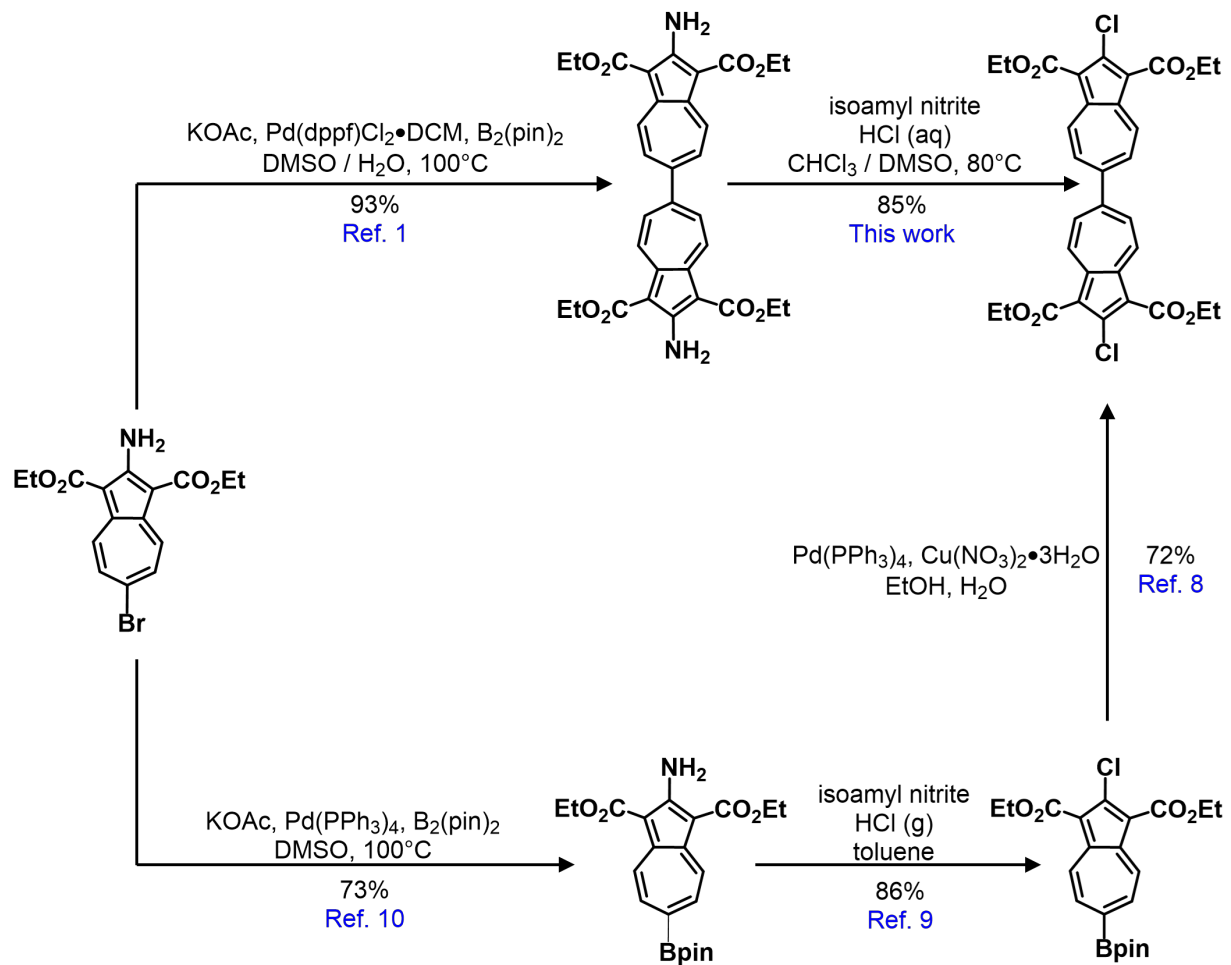

**Scheme S1.** Two alternative routes to **3a** starting from 2-amino-6-bromo-1,3-diethoxycarbonylazulene.<sup>1, 8-10</sup>

#### A4. Synthesis of 2-chloro-1,1',3,3'-tetraethoxycarbonyl-6,6'-biazulene (**3b**)

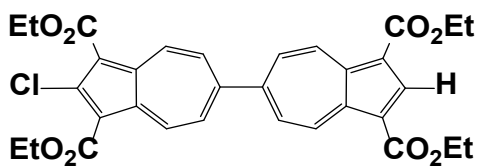

A biphasic mixture consisting of 12 M aqueous HCl (8 mL), **2b** (0.174 g, 0.312 mmol), and CHCl<sub>3</sub> (2 mL) was stirred for 10 minutes at 30 °C. Then isoamyl nitrite (0.17 mL, 1.27 mmol) was added in one portion followed by an additional 6 mL of CHCl<sub>3</sub>. As the solution darkened, the reaction flask was equipped with a reflux condenser to prevent evaporation of CHCl<sub>3</sub>. The heating was removed, and the color of the mixture gained a purple hue over a period of 4.5 hours. The temperature of the mixture was then raised to 60 °C for 19 hours. Deionized water (50 mL) was added, and the organic layer was separated and washed with deionized water (4 × 20 mL). The resulting solution was treated with 7.3 g of NaHCO<sub>3</sub>. Sodium bicarbonate was filtered off, and the filtrate was dried over anhydrous Na<sub>2</sub>SO<sub>4</sub>. The drying agent was filtered off and the filtrate was concentrated to dryness under reduced pressure to afford dark red **3b** (0.158 g, 0.274 mmol) in an 88% yield. Mp: 180 °C (dec.). HRMS (m/z, ES<sup>+</sup>): Calcd for C<sub>32</sub>H<sub>29</sub>ClO<sub>8</sub><sup>+</sup>: 576.1551, found: 576.1578. <sup>1</sup>H NMR (500 MHz, CDCl<sub>3</sub>): δ 9.88 (d, <sup>3</sup>J<sub>HH</sub> = 10.7 Hz, 2H, H<sup>4',8'</sup>), 9.61 (d, <sup>3</sup>J<sub>HH</sub> = 10.7 Hz, 2H, H<sup>4,8</sup>), 8.91 (s, 1H, H<sup>2'</sup>), 7.94 (d, <sup>3</sup>J<sub>HH</sub> = 10.7 Hz, 4H, H<sup>5,5',7,7'</sup>), 4.52 (q, <sup>3</sup>J<sub>HH</sub> = 7.1 Hz, 4H, CH<sub>2</sub>), 4.47 (q, J = 7.1 Hz, 4H, CH<sub>2</sub>), 1.50 (t, J = 7.2 Hz, 6H, CH<sub>3</sub>), 1.47 (t, J = 7.2 Hz, 6H, CH<sub>3</sub>) ppm. <sup>13</sup>C {<sup>1</sup>H} NMR (126 MHz, CDCl<sub>3</sub>): δ 164.98 (C=O), 164.30 (C=O), 155.62, 155.45, 144.73, 144.65, 143.13, 140.88, 138.55, 137.31, 131.94, 131.29, 117.51, 116.54 (aromatic C), 61.06, 60.45 (CH<sub>2</sub>), 14.72, 14.58 (CH<sub>3</sub>) ppm. UV-Vis [CH<sub>2</sub>Cl<sub>2</sub>, λ<sub>max</sub> (ε × 10<sup>-3</sup> M<sup>-1</sup> cm<sup>-1</sup>): 339 (77.11), 371 (53.68), 525 (2.39) nm.



## B. NMR Spectra

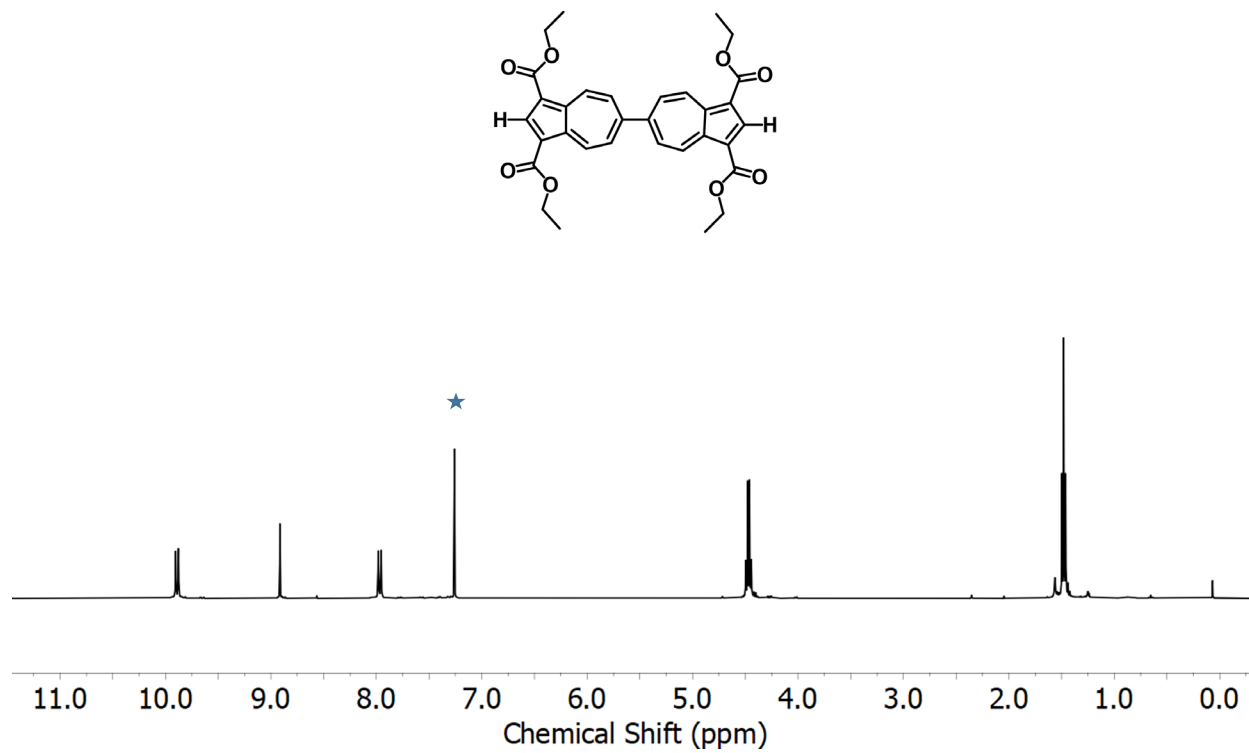

**Figure S1.** <sup>1</sup>H NMR (400 MHz, CDCl<sub>3</sub>) spectrum of **1**; (★) denotes NMR solvent residual resonance.

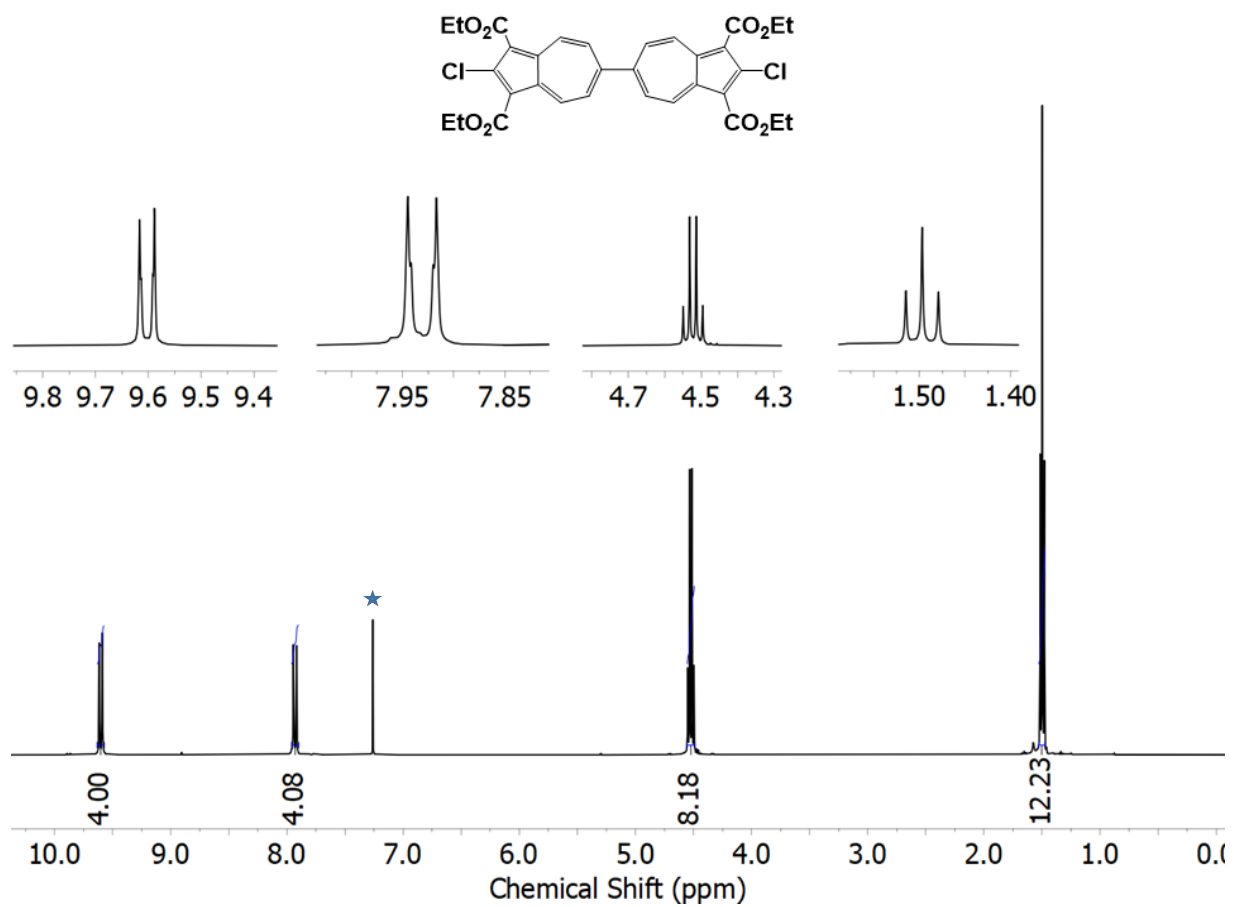

**Figure S2.**  $^1\text{H}$  NMR (500 MHz,  $\text{CDCl}_3$ ) spectrum of **3a**. (\*) denotes NMR solvent residual resonance.

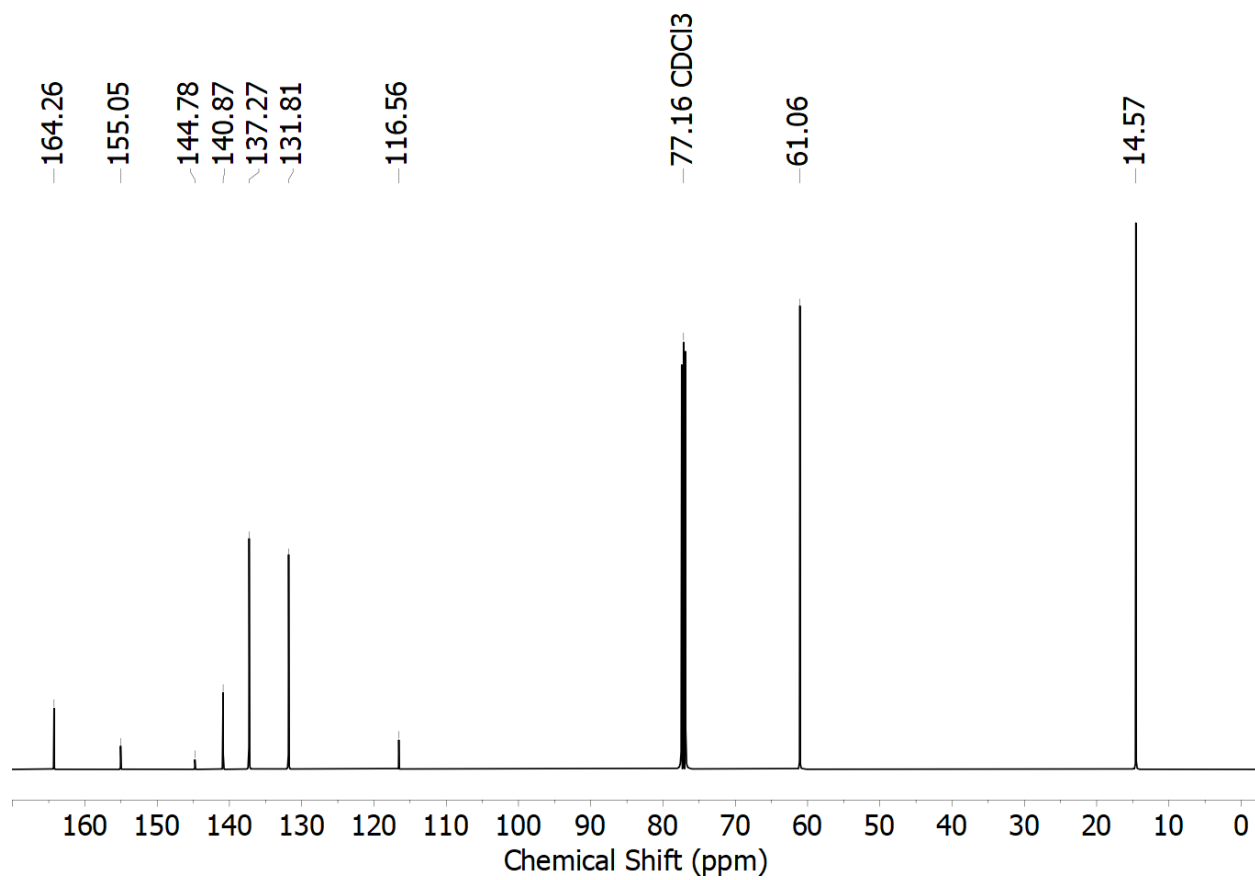

**Figure S3.**  $^{13}\text{C}\{^1\text{H}\}$  NMR (126 MHz,  $\text{CDCl}_3$ ) spectrum of **3a**.

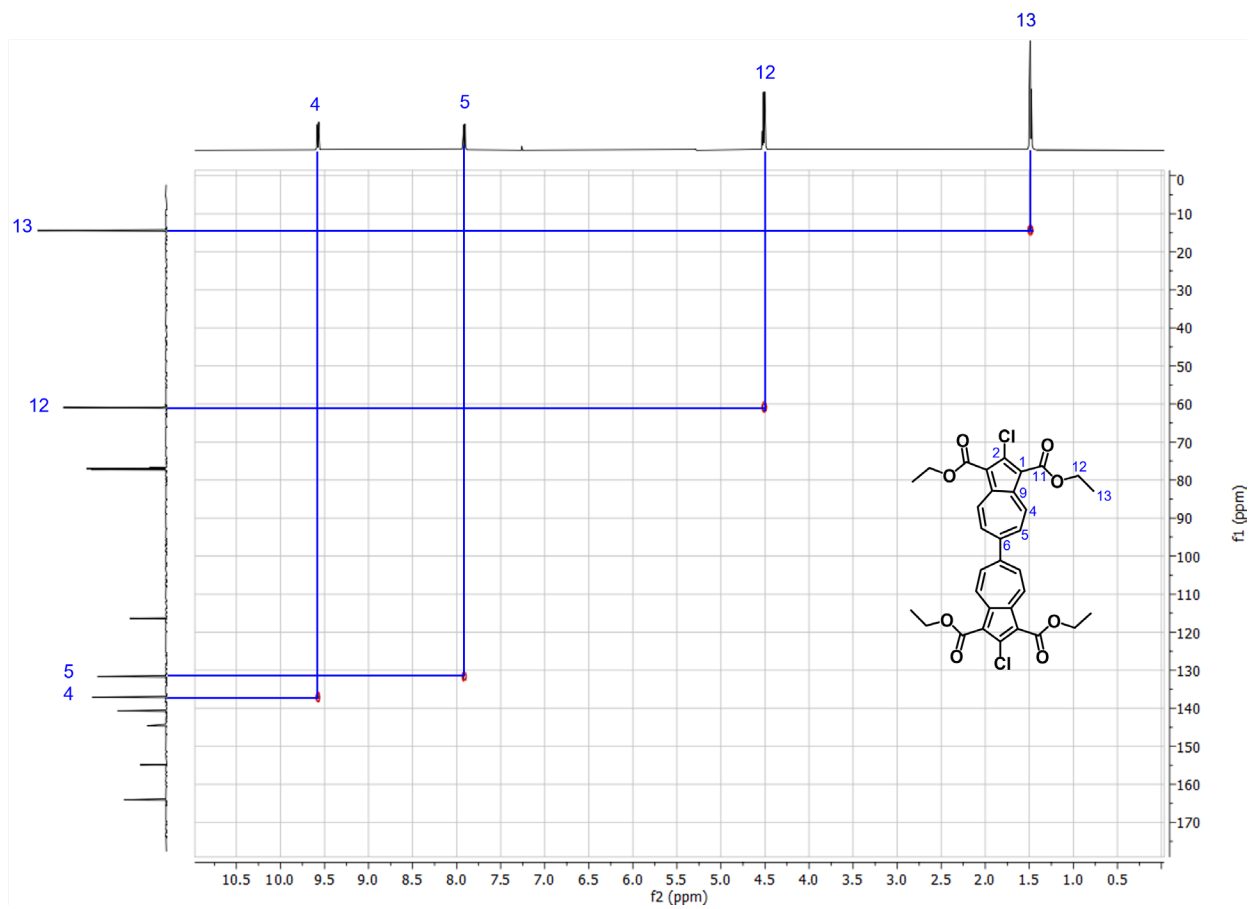

**Figure S4.** HSQC NMR (600 MHz, CDCl<sub>3</sub>) spectrum of **3a**.

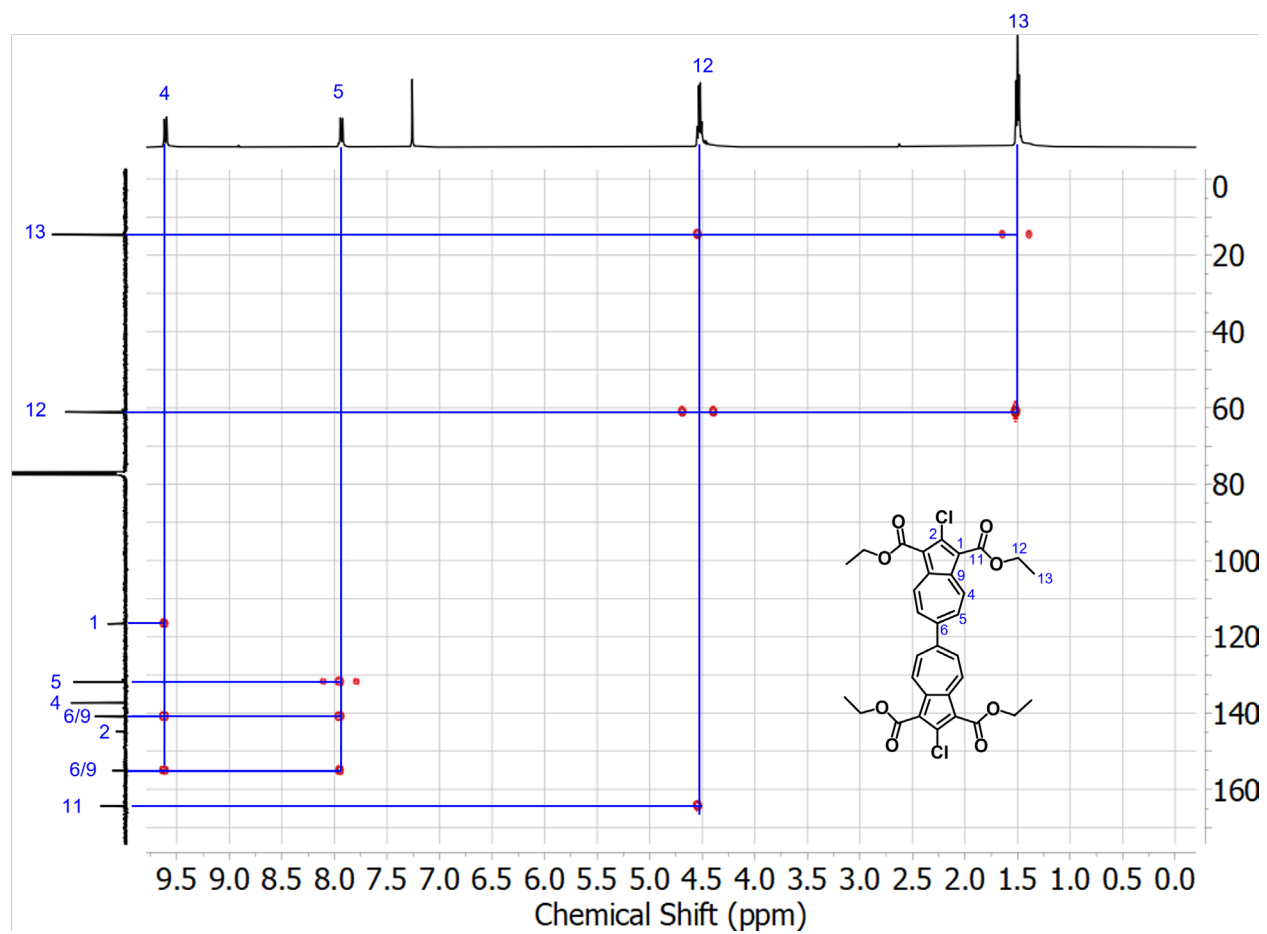

**Figure S5.** HMBC NMR (500 MHz,  $\text{CDCl}_3$ ) spectrum of **3a**.

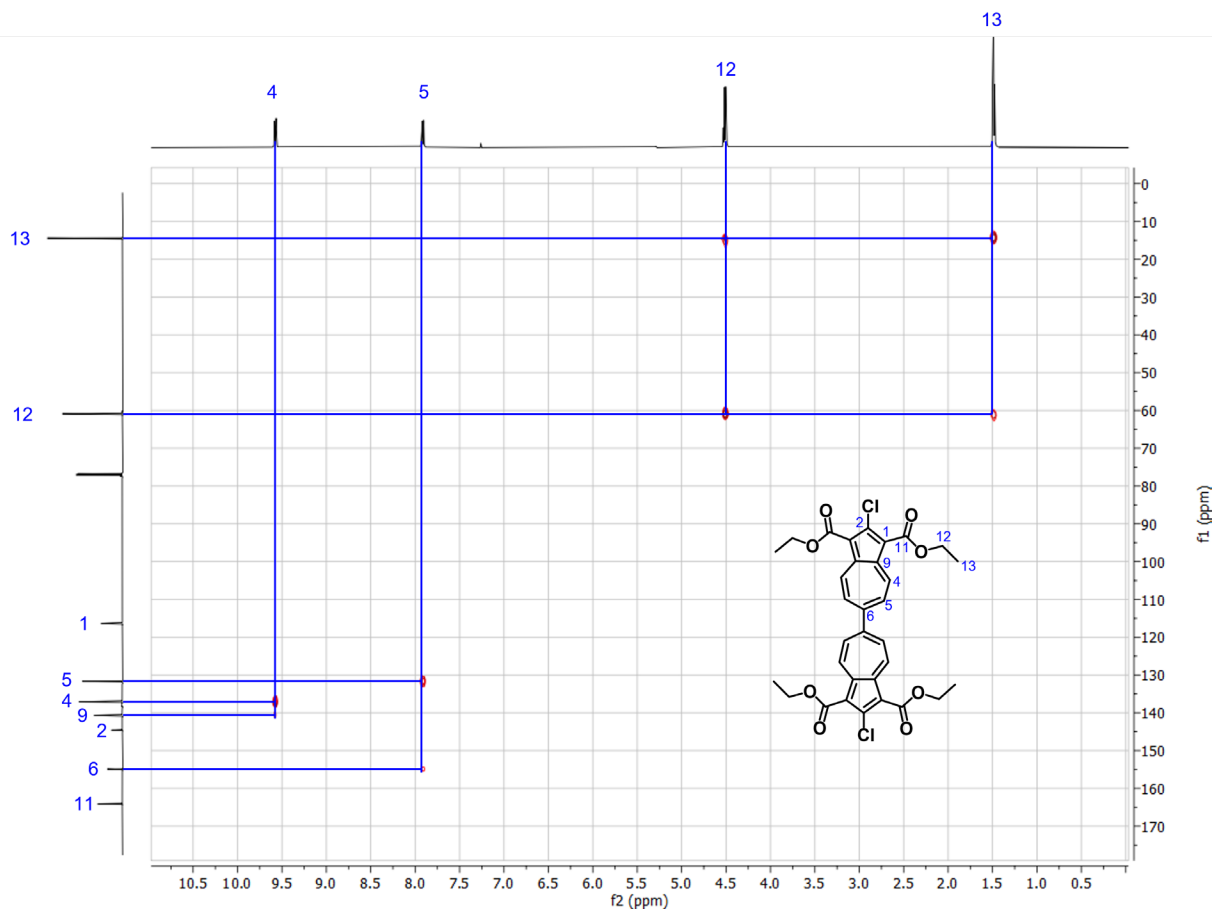

**Figure S6.** 1,1-ADEQUATE NMR (600 MHz, CDCl<sub>3</sub>) spectrum of **3a**.

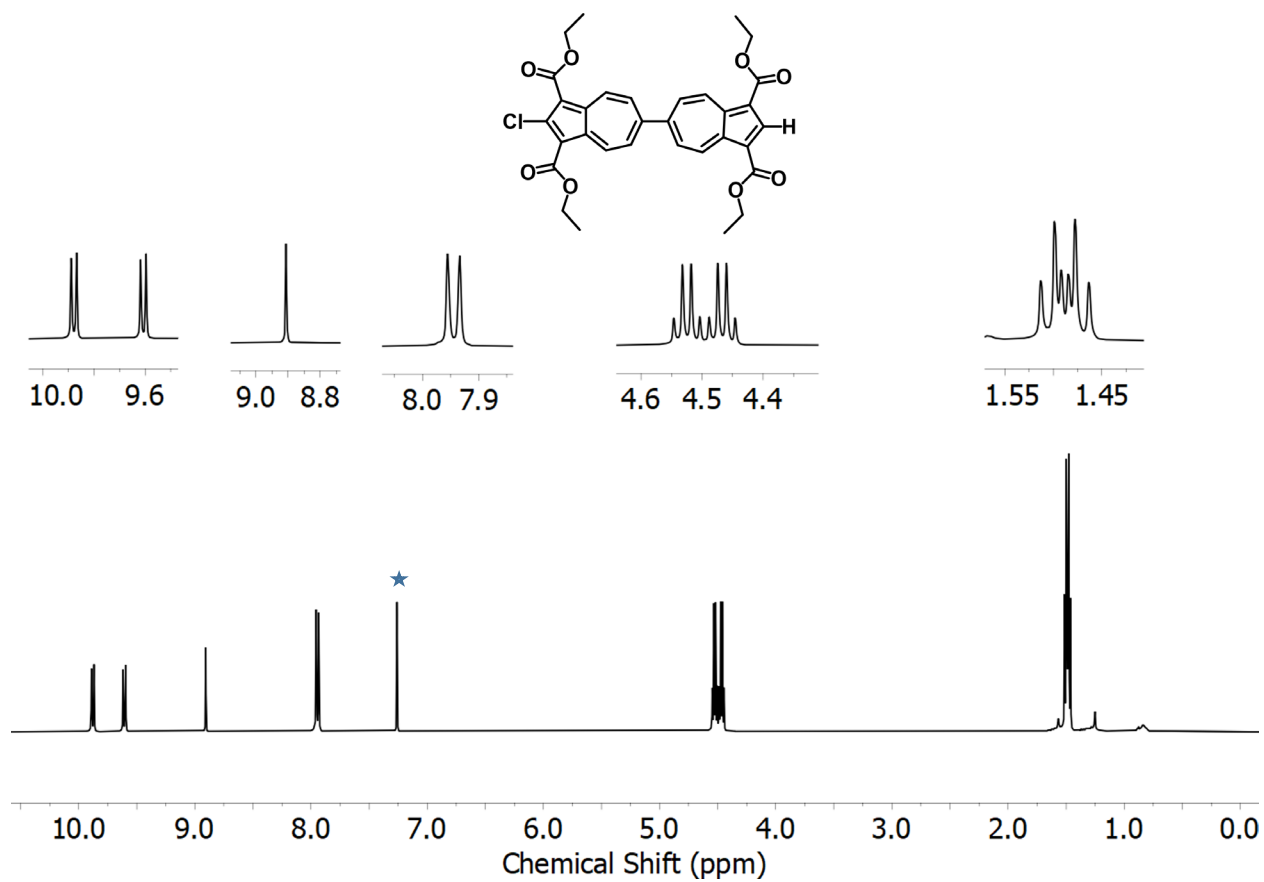

**Figure S7.** <sup>1</sup>H NMR (500 MHz, CDCl<sub>3</sub>) spectrum of **3b**. (★) denotes NMR solvent residual resonance.

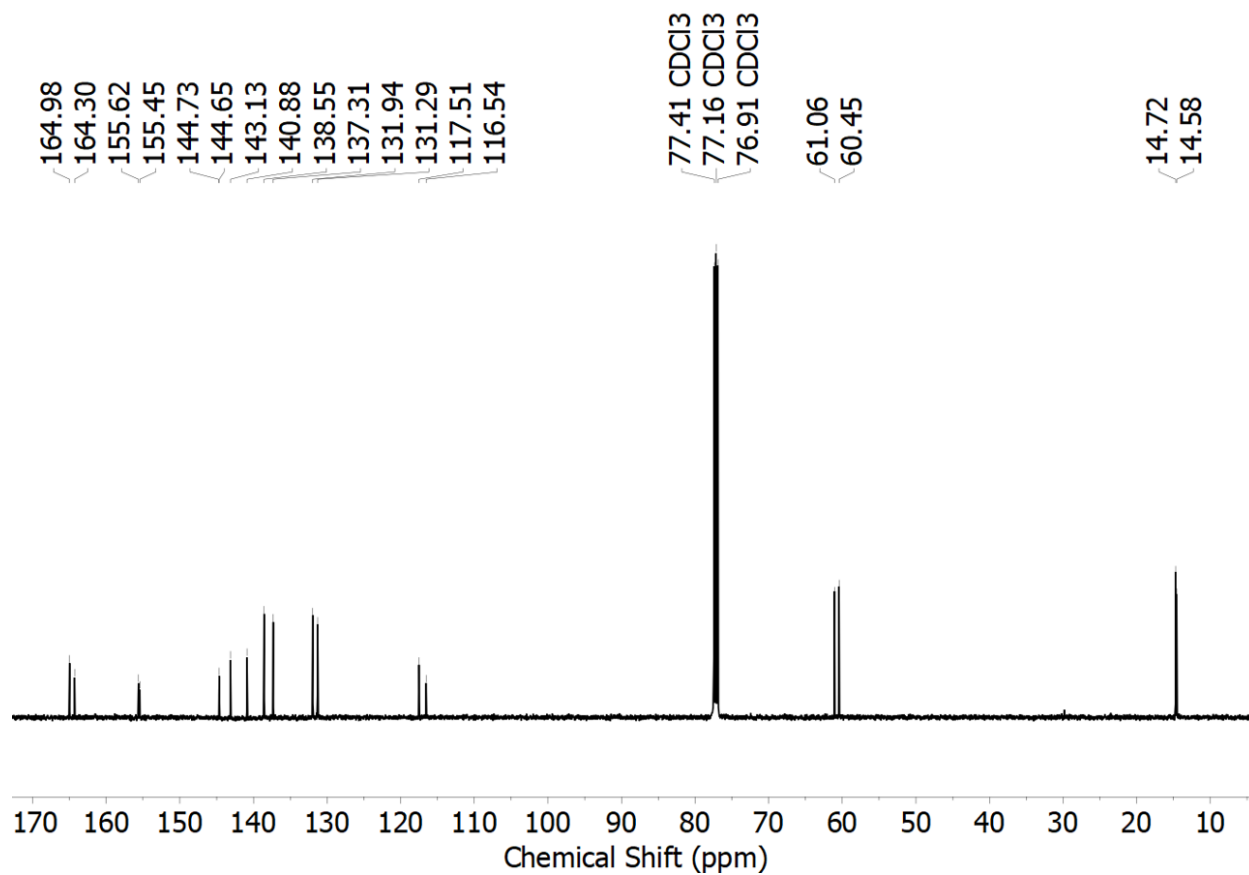

**Figure S8.**  $^{13}\text{C}\{^1\text{H}\}$  NMR (126 MHz,  $\text{CDCl}_3$ ) spectrum of **3b**.



## C. Electronic absorption spectra

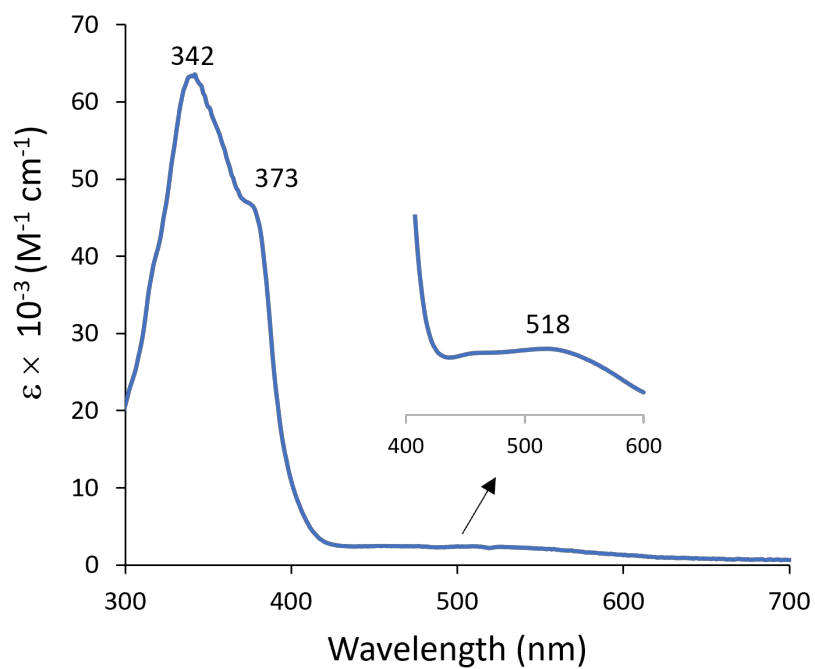

**Figure S9.** Electronic absorption spectrum of **1** in  $\text{CH}_2\text{Cl}_2$ .

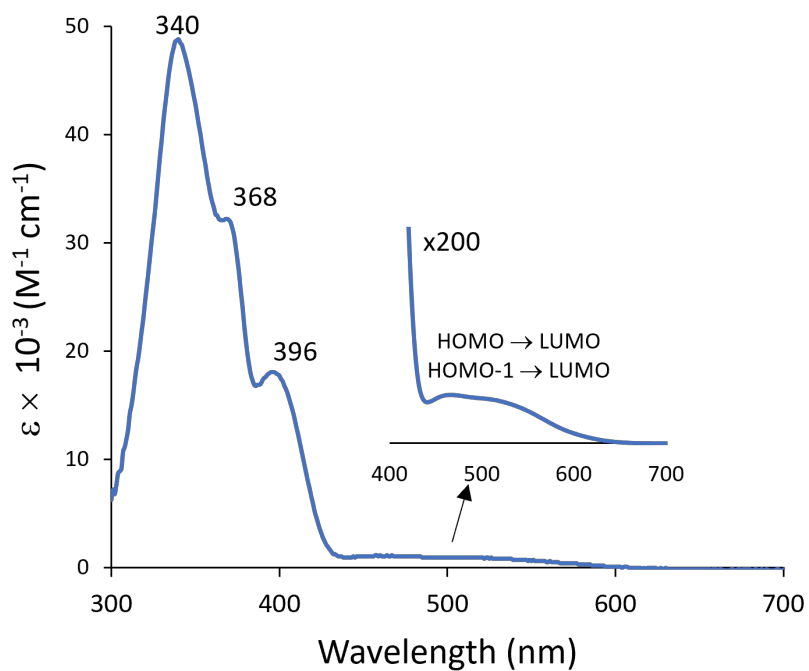

**Figure S10.** Electronic absorption spectrum of **3a** in  $\text{CH}_2\text{Cl}_2$ .

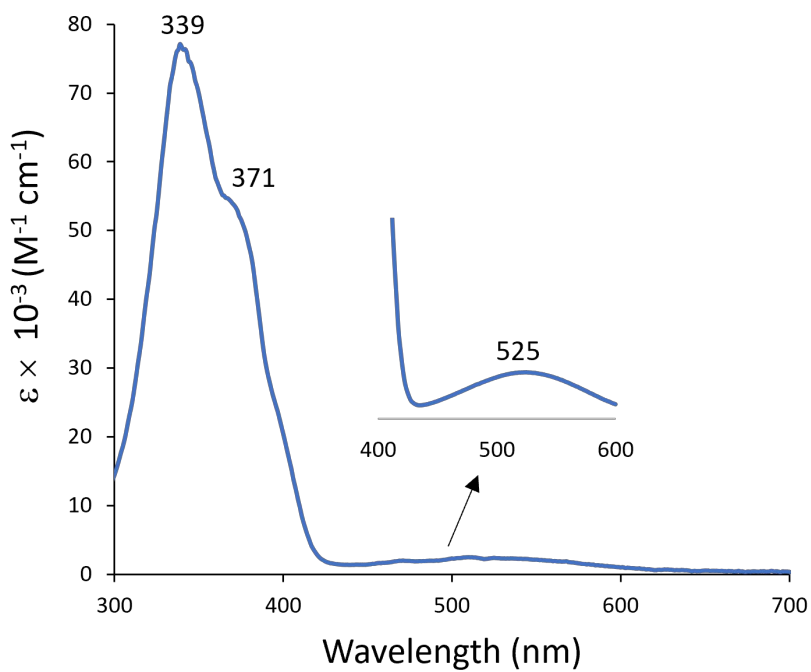

**Figure S11.** Electronic absorption spectrum of **3b** in CH<sub>2</sub>Cl<sub>2</sub>.

**Table S1.** Summary of the UV vis data for compounds **1**, **3a**, and **3b**.

| Compound  | $\lambda_{\max}$ ( $\epsilon \times 10^{-3} \text{ M}^{-1} \text{ cm}^{-1}$ ) |
|-----------|-------------------------------------------------------------------------------|
| <b>1</b>  | 342 (63.58), 373 (47.06), 518 (2.24) nm                                       |
| <b>3a</b> | 340 (48.81), 368 (32.22), 396 (18.08), <i>ca.</i> 440-640 (1.06) nm           |
| <b>3b</b> | 339 (77.11), 371 (53.68), 525 (2.39) nm                                       |

## D. Computational Work

### D1. Calculation Details

All calculations were carried out using version 5.4 of the Q-Chem software package.<sup>11</sup> The highest-occupied and lowest-unoccupied molecular orbitals of the unfunctionalized biazulene shown in Fig. 1 were obtained from the geometry-optimized structure based on density functional theory (DFT) calculations using the B3LYP functional<sup>12</sup> and cc-pVDZ basis set.<sup>13</sup> The time-dependent DFT (TD-DFT) calculations on **3a** also used the B3LYP functional and cc-pVDZ basis set along with the integral equation formalism polarizable continuum model<sup>14</sup> (IEFPCM) with static dielectric constant  $\epsilon = 8.93$  to represent dichloromethane as the solvent. The geometry was the B3LYP/cc-pVDZ structure with all ester groups extended away from the molecule, in contrast to the crystal structure but expected for the molecule in solution. However, this change in the molecular structure has little effect on the electronic transition energies or oscillator strengths.

To probe the minor heptafulvalene-like zwitterionic resonance forms illustrated in Figure 7, we carried out constrained DFT calculations.<sup>15</sup> In this approach, we constrained the charge on one Cl atom to be +1 and the total charge on the carbon atoms of the 5-membered ring most distant from this Cl to be -1. These constraints should not be regarded as more than approximate models of the resonance structures. The two possible constrained electronic structures of this type (in the dichloromethane dielectric continuum model at the geometry optimized in dichloromethane) give dipole moments of 16.7 and 16.8 D; the slight difference arises from slight asymmetry in the ester substituents. Not surprisingly, these higher energy, minor resonance forms have significantly redshifted absorption features in their hypothetical electronic spectra, e.g., the weak HOMO  $\rightarrow$  LUMO transition (shifted down by 0.15 eV) occurs at 1655 nm compared to 532.5 nm for the unconstrained molecule calculation and the strongest absorption is at 624 nm corresponding to the HOMO-1  $\rightarrow$  LUMO transition that is at 526.8 nm and weak for the unconstrained molecule.

**Table S2.** Cartesian coordinates of the atoms in 6,6'-biazulene used to generate its HOMO/LUMO plot in Fig. 1.

|   | <b>X</b>      | <b>Y</b>      | <b>Z</b>      |
|---|---------------|---------------|---------------|
| C | 5.2079964419  | -1.0165006532 | 0.4981649608  |
| C | 3.8583619641  | -0.6559040849 | 0.3218155463  |
| C | 3.8555447419  | 0.6863998447  | -0.3408094919 |
| C | 5.2034315854  | 1.0495848952  | -0.5236706134 |
| C | 6.0143197840  | 0.0171116858  | -0.0149983706 |
| C | 2.7387889861  | 1.4353287302  | -0.7085095298 |
| C | 1.3788672270  | 1.1459347156  | -0.5585287697 |
| C | 0.7516307557  | 0.0123409923  | -0.0020111625 |
| C | 1.3835420914  | -1.1199755573 | 0.5512412723  |
| C | 2.7449071575  | -1.4069065067 | 0.6945800963  |
| H | 5.5569098662  | -1.9418497251 | 0.9543656122  |
| C | -0.7539502019 | 0.0112587731  | 0.0017254191  |
| C | -1.3828240923 | 1.1428008164  | 0.5606324244  |
| C | -2.7431308816 | 1.4300842995  | 0.7110028810  |
| C | -3.8588248821 | 0.6803698745  | 0.3416438983  |
| C | -3.8596815980 | -0.6605305804 | -0.3238466568 |
| C | -5.2088175508 | -1.0225885947 | -0.5011577235 |
| C | -6.0166049465 | 0.0090216510  | 0.0136814064  |
| C | -5.2072077855 | 1.0413970783  | 0.5249452759  |
| H | -5.5564326027 | -1.9475327821 | -0.9591759560 |
| C | -2.7452036587 | -1.4092529153 | -0.6980404763 |
| C | -1.3842219952 | -1.1207290934 | -0.5539910012 |
| H | -5.5532367781 | 1.9661507182  | 0.9845393124  |
| H | -2.9689456248 | -2.3660937761 | -1.1830151653 |
| H | -2.9656159105 | 2.3866352405  | 1.1971180558  |
| H | -0.7083387440 | -1.8782690950 | -0.9577795816 |
| H | 2.9598927647  | 2.3931760105  | -1.1927016539 |
| H | 0.7005231813  | 1.9038672351  | -0.9574580129 |
| H | -0.7055439721 | 1.9007908173  | 0.9612466714  |
| H | 2.9700271691  | -2.3644465101 | 1.1775362276  |
| H | 0.7087195757  | -1.8793082316 | 0.9534328005  |
| H | 5.5482571271  | 1.9758553708  | -0.9813178149 |
| H | 7.1051332028  | 0.0178557562  | -0.0177298836 |
| H | -7.1074149248 | 0.0083850309  | 0.0159735138  |

**Table S3.** Cartesian coordinates of the atoms in **3a** used to generate Figure S12.

|    | <b>X</b>      | <b>Y</b>      | <b>Z</b>      |
|----|---------------|---------------|---------------|
| C  | 5.2109534425  | -1.0389112183 | 0.5529452883  |
| C  | 3.8566540911  | -0.6422679540 | 0.3192306541  |
| C  | 3.8812892924  | 0.6597695994  | -0.3586666802 |
| C  | 5.2501761064  | 1.0463207524  | -0.5128348271 |
| C  | 6.0312351996  | 0.0008431764  | 0.0442351205  |
| C  | 2.7699320742  | 1.4043937225  | -0.7788104224 |
| C  | 1.4067624439  | 1.1315531926  | -0.6631399815 |
| C  | 0.7449854019  | 0.0234198972  | -0.1021315573 |
| C  | 1.3653334288  | -1.0937661577 | 0.4874372876  |
| C  | 2.7179518589  | -1.3800603709 | 0.6730372425  |
| C  | 5.6848284393  | 2.3127804728  | -1.1386015105 |
| O  | 4.9321028938  | 3.0995236740  | -1.7006969545 |
| Cl | 7.7633144191  | -0.0028398287 | 0.1040190699  |
| C  | 5.5988745725  | -2.3092918647 | 1.2012276386  |
| O  | 4.8126920198  | -3.0760054380 | 1.7447796313  |
| O  | 7.0042267207  | 2.5452154091  | -1.0338905766 |
| C  | 7.4890827245  | 3.7714617997  | -1.6413625192 |
| C  | 8.9889012373  | 3.8169328148  | -1.4371963358 |
| C  | -0.7568892431 | 0.0357464988  | -0.1328877459 |
| C  | -1.3948171854 | 1.2038639444  | 0.3257502452  |
| C  | -2.7522313272 | 1.5067173213  | 0.4281910362  |
| C  | -3.8766750847 | 0.7414592180  | 0.0895007653  |
| C  | -3.8806709800 | -0.6150266836 | -0.4739920528 |
| C  | -5.2440888953 | -1.0045884527 | -0.6629298304 |
| C  | -6.0410340271 | 0.0814978129  | -0.2174621791 |
| C  | -5.2362293689 | 1.1510880572  | 0.2475489590  |
| C  | -5.6624100314 | -2.3092547441 | -1.2162750798 |
| O  | -4.8986667823 | -3.1218259787 | -1.7236291632 |
| C  | -2.7573959131 | -1.4003842621 | -0.7674803898 |
| C  | -1.3989262442 | -1.1206030158 | -0.6140187370 |
| C  | -5.6460982726 | 2.4548165410  | 0.8103858891  |
| O  | -4.9041017098 | 3.4226212248  | 0.9228525443  |
| Cl | -7.7712329798 | 0.1408109821  | -0.3182349885 |
| O  | -6.9245679925 | 2.4799389795  | 1.2226182899  |
| C  | -7.3990979882 | 3.7360155483  | 1.7755147264  |
| C  | -8.8393524610 | 3.5309315975  | 2.1965420967  |
| O  | -6.9803080018 | -2.5463064630 | -1.1014394867 |

|   |               |               |               |
|---|---------------|---------------|---------------|
| C | -7.4547596047 | -3.8078868124 | -1.6403684313 |
| C | -8.9524357589 | -3.8592526672 | -1.4222653085 |
| O | 6.9153209430  | -2.5703050607 | 1.1361334386  |
| C | 7.3579761541  | -3.8010128172 | 1.7664504433  |
| C | 8.8612369102  | -3.8798193328 | 1.6010633576  |
| H | -2.9895981075 | -2.3780387849 | -1.1893960528 |
| H | -2.9823961625 | 2.4952220513  | 0.8258348805  |
| H | -0.7369949862 | -1.9242180796 | -0.9453423388 |
| H | 3.0198753244  | 2.3397161872  | -1.2788098391 |
| H | 0.7596914349  | 1.8958204263  | -1.0997527223 |
| H | -0.7313086957 | 1.9950803629  | 0.6825605052  |
| H | 2.9320682308  | -2.3191149029 | 1.1828402112  |
| H | 0.6891503753  | -1.8520934994 | 0.8890348178  |
| H | 6.8431070421  | -4.6474218592 | 1.2854808344  |
| H | 7.0568419763  | -3.7827169328 | 2.8254416747  |
| H | -7.2988184985 | 4.5188892990  | 1.0073255216  |
| H | -6.7547928097 | 4.0126656814  | 2.6244053081  |
| H | 6.9799083556  | 4.6245183966  | -1.1660428015 |
| H | 7.2148401278  | 3.7688681102  | -2.7077944563 |
| H | -6.9321660800 | -4.6293985445 | -1.1258636671 |
| H | -7.1886673839 | -3.8572162517 | -2.7078656811 |
| H | -9.4676982585 | 3.2503702360  | 1.3368502552  |
| H | -9.2337519115 | 4.4664904804  | 2.6232773113  |
| H | -8.9184342694 | 2.7415980531  | 2.9605980620  |
| H | 9.3572937560  | -3.0226087111 | 2.0826634659  |
| H | 9.1419887404  | -3.8933966540 | 0.5361938825  |
| H | 9.2345659744  | -4.8042592957 | 2.0689389636  |
| H | 9.4791734041  | 2.9539379884  | -1.9143729943 |
| H | 9.2431756416  | 3.8152731376  | -0.3655698703 |
| H | 9.3931025227  | 4.7374955101  | -1.8867910883 |
| H | -9.1983535499 | -3.8050880793 | -0.3500118345 |
| H | -9.3495977451 | -4.8061307213 | -1.8205727307 |
| H | -9.4559132494 | -3.0271359413 | -1.9389027895 |

**Table S4.** Allowed transition wavelengths, oscillator strengths, and transition orbital amplitudes obtained from the TD-DFT/B3LYP/cc-pVDZ calculations. (Transition wavelengths correspond to the transition energies shifted down by 0.15 eV as shown in Figure S12).

| <b>Adjusted Transition Wavelength (nm)</b> | <b>Oscillator Strength</b> | <b>Transition Orbital Amplitudes</b>                                                                                       |
|--------------------------------------------|----------------------------|----------------------------------------------------------------------------------------------------------------------------|
| <b>532.5</b>                               | 0.0106                     | 0.9529 HOMO → LUMO                                                                                                         |
| <b>526.8</b>                               | 0.0033                     | 0.9530 HOMO-1 → LUMO                                                                                                       |
| <b>404.0</b>                               | 0.8249                     | 0.9481 HOMO-2 → LUMO<br>0.2334 HOMO → LUMO+1                                                                               |
| <b>379.8</b>                               | 0.00075                    | -0.2287 HOMO-1 → LUMO<br>0.9409 HOMO → LUMO+2                                                                              |
| <b>377.0</b>                               | 0.0018                     | 0.9388 HOMO-1 → LUMO+2<br>-0.2232 HOMO → LUMO                                                                              |
| <b>368.5</b>                               | 0.00014                    | 0.8040 HOMO-3 → LUMO<br>0.4965 HOMO-1 → LUMO+1<br>-0.2740 HOMO → LUMO+3                                                    |
| <b>358.4</b>                               | 0.1393                     | -0.2264 HOMO-1 → LUMO+1<br>0.3879 HOMO-1 → LUMO+3<br>0.7795 HOMO → LUMO+1<br>-0.3958 HOMO → LUMO+3                         |
| <b>355.9</b>                               | 0.0570                     | 0.6254 HOMO-1 → LUMO+1<br>0.4089 HOMO-1 → LUMO+3<br>0.2810 HOMO → LUMO+1<br>0.5733 HOMO → LUMO+3                           |
| <b>341.0</b>                               | 0.00006                    | 0.3434 HOMO-4 → LUMO<br>-0.2669 HOMO-3 → LUMO<br>0.6959 HOMO-2 → LUMO+2<br>0.3017 HOMO-1 → LUMO+1<br>-0.4369 HOMO → LUMO+3 |
| <b>337.2</b>                               | 1.4634                     | 0.2696 HOMO-5 → LUMO<br>-0.3002 HOMO-3 → LUMO+2<br>0.7200 HOMO-1 → LUMO+3<br>-0.4114 HOMO → LUMO+1                         |
| <b>336.7</b>                               | 0.0214                     | 0.9061 HOMO-4 → LUMO<br>-0.2749 HOMO-2 → LUMO+2                                                                            |
| <b>335.7</b>                               | 0.1465                     | 0.9061 HOMO-5 → LUMO<br>-0.2310 HOMO-1 → LUMO+3                                                                            |
| <b>329.0</b>                               | 0.0066                     | 0.9666 HOMO-6 → LUMO                                                                                                       |
| <b>324.7</b>                               | 0.0055                     | 0.9622 HOMO-7 → LUMO                                                                                                       |
| <b>322.2</b>                               | 0.0569                     | 0.2125 HOMO-14 → LUMO<br>0.8810 HOMO-2 → LUMO+1                                                                            |

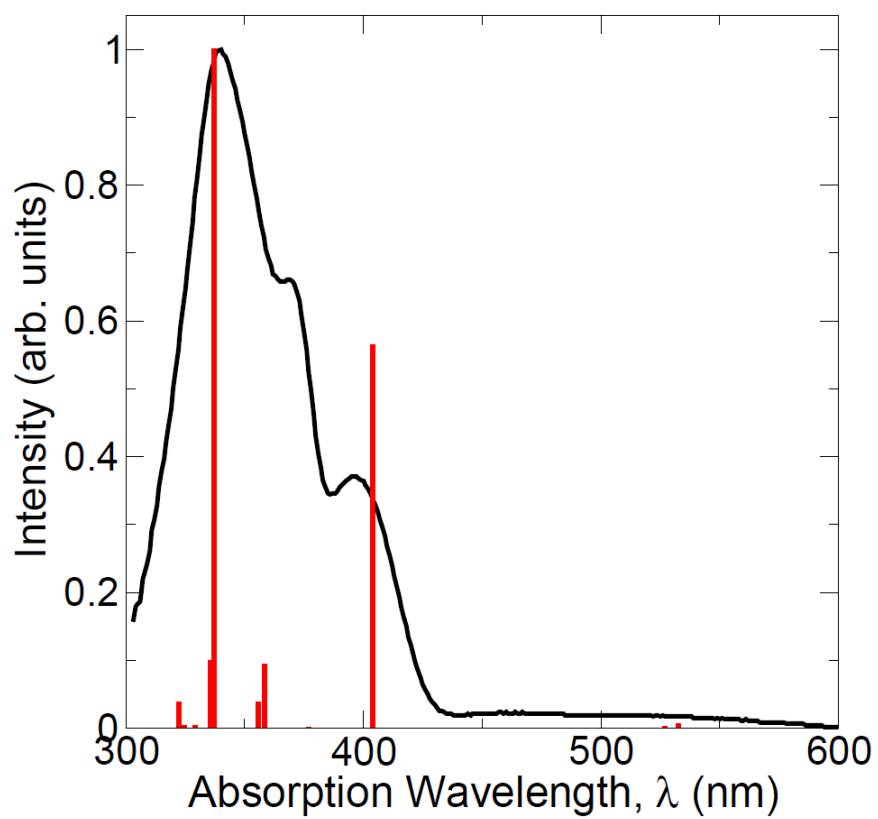

**Figure S12.** Experimental vs. simulated electronic spectra of **3a**. The simulated transition wavelengths are shifted down by a 0.15 eV increment.



## E. Electrochemistry

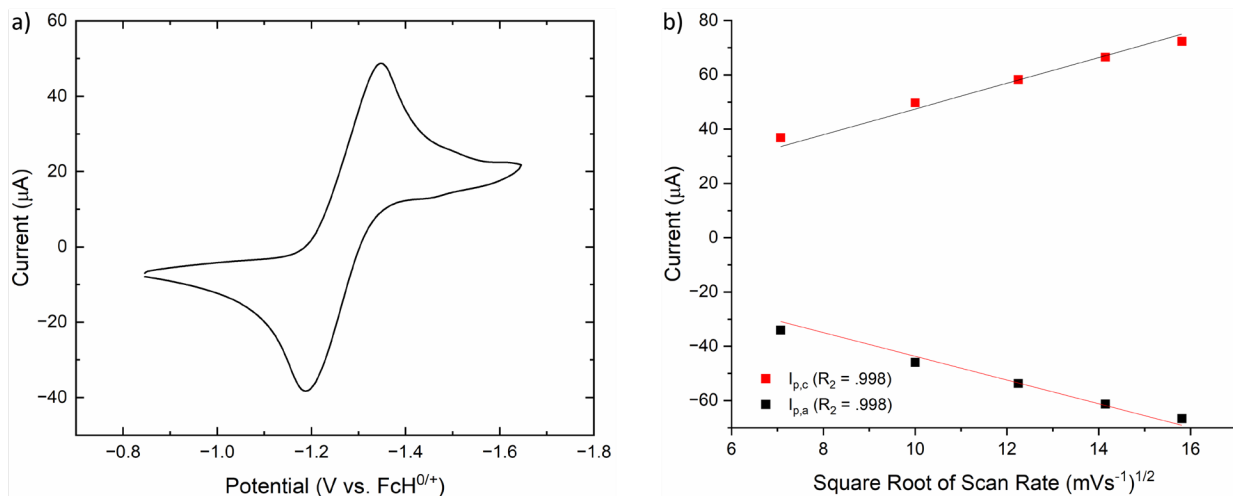

**Figure S13.** a) Cyclic voltammogram of 1.1 mM solution of **1** in 0.1 M  $[\text{nBu}_4\text{N}]^+[\text{PF}_6]^-/\text{CH}_2\text{Cl}_2$  vs. external  $\text{Cp}_2\text{Fe}^{0/+}$  at 22 °C (scan rate = 100 mV/s). b) Scan rate dependence of **1** in 0.1 M  $[\text{nBu}_4\text{N}]^+[\text{PF}_6]^-/\text{CH}_2\text{Cl}_2$ .

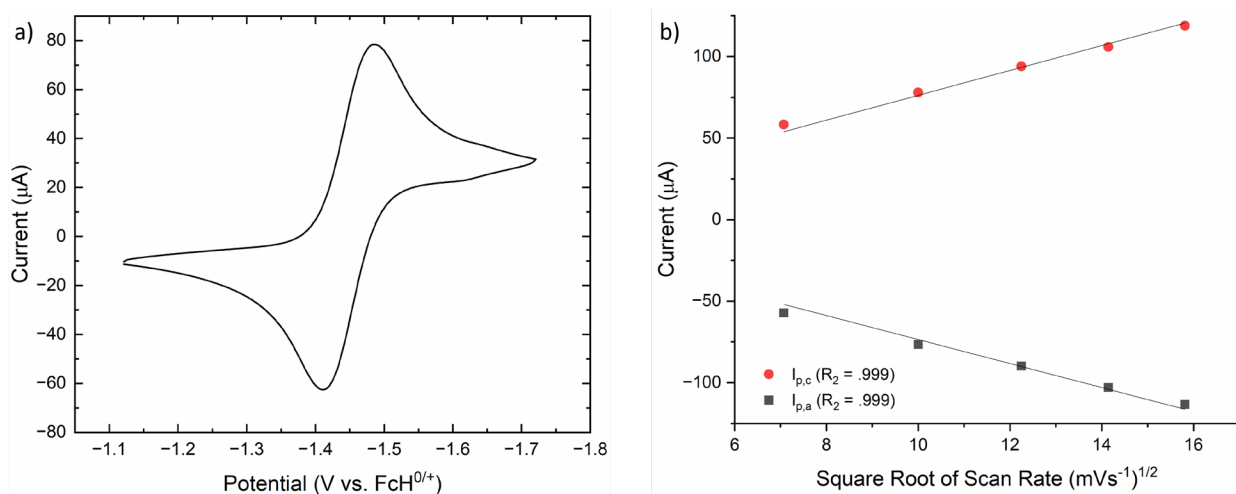

**Figure S14.** a) Cyclic voltammogram of 2.2 mM solution of **2b** in 0.1 M  $[\text{nBu}_4\text{N}]^+[\text{PF}_6]^-/\text{CH}_2\text{Cl}_2$  vs. external  $\text{Cp}_2\text{Fe}^{0/+}$  at 22 °C (scan rate = 100 mV/s). b) Scan rate dependence of **2b** in 0.1 M  $[\text{nBu}_4\text{N}]^+[\text{PF}_6]^-/\text{CH}_2\text{Cl}_2$ .

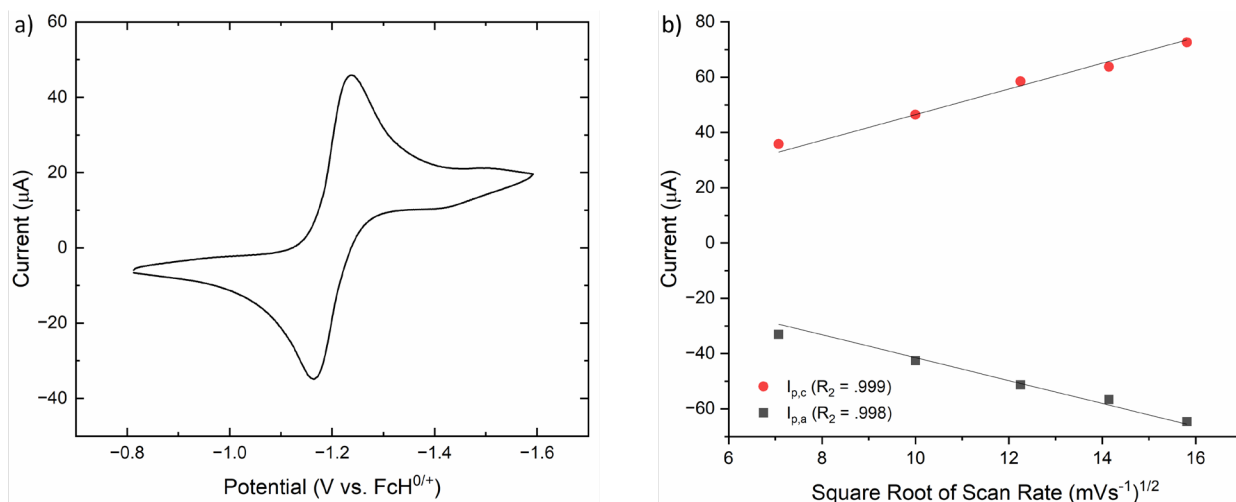

**Figure S15.** a) Cyclic voltammogram of 1.6 mM solution of **3a** in 0.1 M [<sup>n</sup>Bu<sub>4</sub>N]<sup>+</sup>[PF<sub>6</sub>]<sup>-</sup>/CH<sub>2</sub>Cl<sub>2</sub> vs. external Cp<sub>2</sub>Fe<sup>0/+</sup> at 22 °C (scan rate = 100 mV/s). b) Scan rate dependence of **3a** in 0.1 M [<sup>n</sup>Bu<sub>4</sub>N]<sup>+</sup>[PF<sub>6</sub>]<sup>-</sup>/CH<sub>2</sub>Cl<sub>2</sub>.

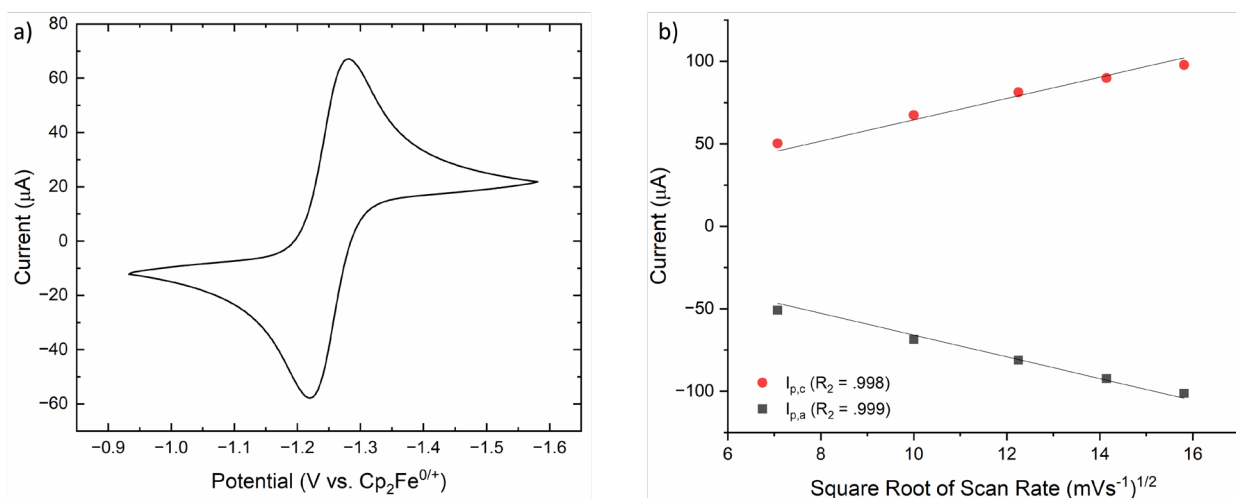

**Figure S16.** a) Cyclic voltammogram of 2.0 mM solution of **3b** in 0.1 M [<sup>n</sup>Bu<sub>4</sub>N]<sup>+</sup>[PF<sub>6</sub>]<sup>-</sup>/CH<sub>2</sub>Cl<sub>2</sub> vs. external Cp<sub>2</sub>Fe<sup>0/+</sup> at 22 °C (scan rate = 100 mV/s). b) Scan rate dependence of **3b** in 0.1 M [<sup>n</sup>Bu<sub>4</sub>N]<sup>+</sup>[PF<sub>6</sub>]<sup>-</sup>/CH<sub>2</sub>Cl<sub>2</sub>.

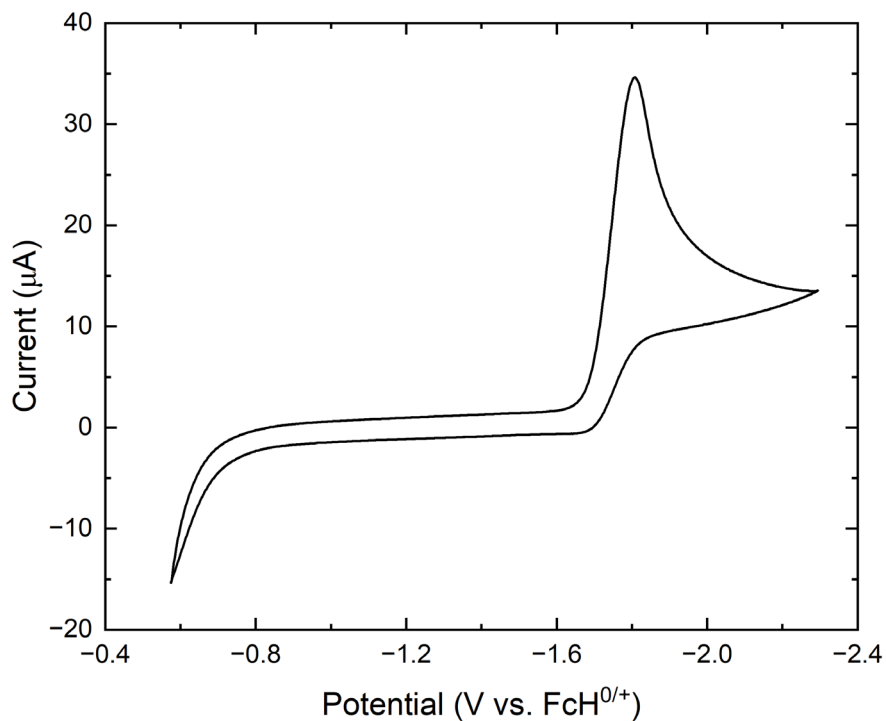

**Figure S17.** Cyclic voltammogram of 2.0 mM solution of 1,3-diethoxycarbonylazulene in 0.1 M [<sup>n</sup>Bu<sub>4</sub>N]<sup>+</sup>[PF<sub>6</sub>]<sup>-</sup>/CH<sub>2</sub>Cl<sub>2</sub> vs. external Cp<sub>2</sub>Fe<sup>0/+</sup> at 22 °C (scan rate = 100 mV/s).

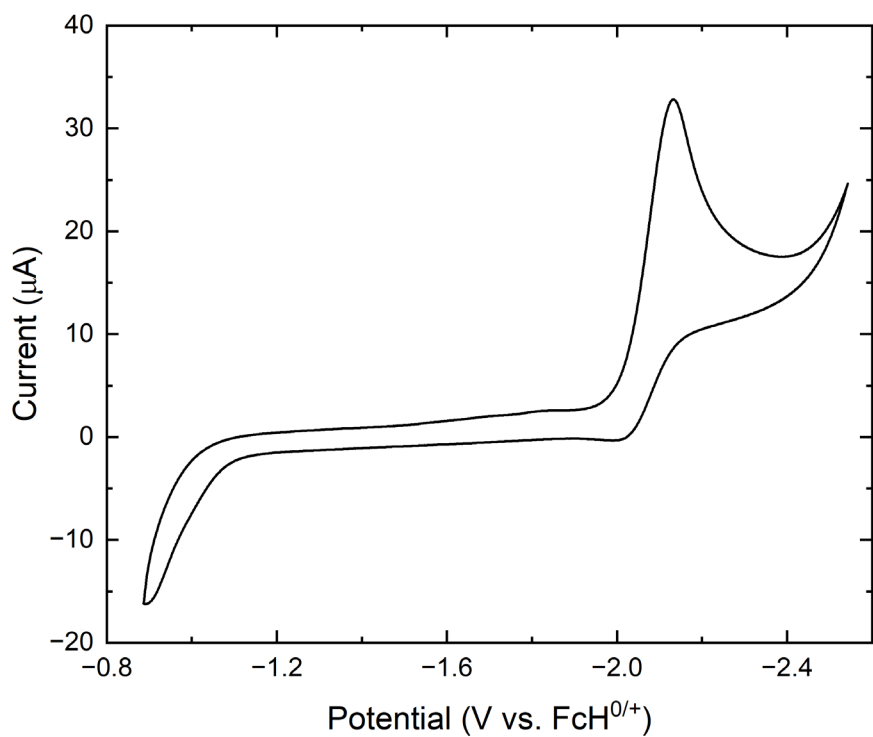

**Figure S18.** Cyclic voltammogram of 2.0 mM solution of 2-amino-1,3-diethoxycarbonylazulene in 0.1 M [<sup>n</sup>Bu<sub>4</sub>N]<sup>+</sup>[PF<sub>6</sub>]<sup>-</sup>/CH<sub>2</sub>Cl<sub>2</sub> vs. external Cp<sub>2</sub>Fe<sup>0/+</sup> at 22 °C (scan rate = 100 mV/s).

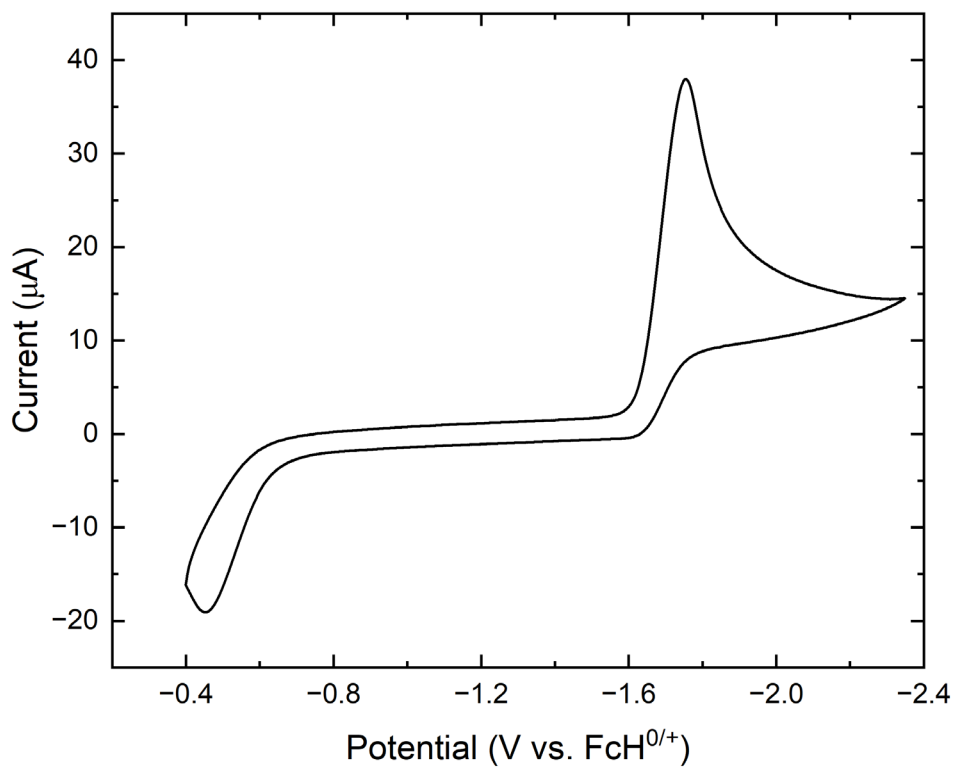

**Figure S19.** Cyclic voltammogram of 2.0 mM solution of 2-chloro-1,3-diethoxycarbonylazulene in 0.1 M  $[\text{mBu}_4\text{N}]^+[\text{PF}_6]^-/\text{CH}_2\text{Cl}_2$  vs. external  $\text{Cp}_2\text{Fe}^{0/+}$  at 22 °C (scan rate = 100 mV/s).

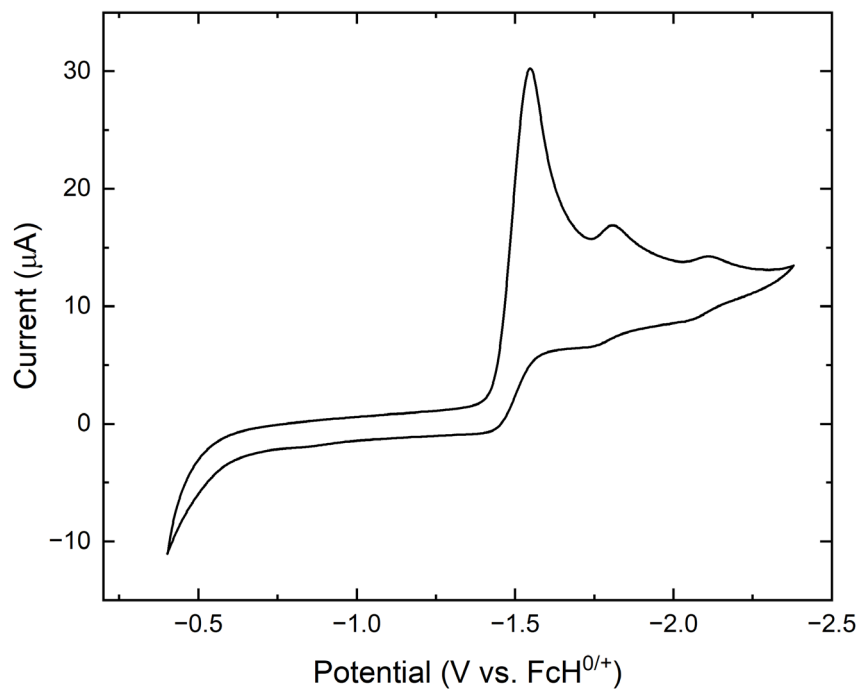

**Figure 20.** Cyclic voltammogram of 2.0 mM solution of 2-isocyano-1,3-diethoxycarbonylazulene in 0.1 M  $[\text{mBu}_4\text{N}]^+[\text{PF}_6]^-/\text{CH}_2\text{Cl}_2$  vs. external  $\text{Cp}_2\text{Fe}^{0/+}$  at 22 °C (scan rate = 100 mV/s).

**Table S5.**  $E_{1/2}$  potentials and  $\sigma_p$  parameters for Fig. 4.

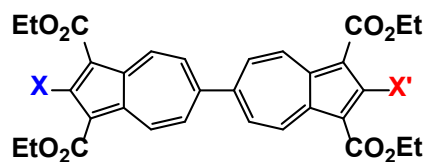

| Ref.      | X                | X'               | $\sigma_p(X) + \sigma_p(X')$ | $E_{1/2}$ (V)<br>$Az^0 \rightarrow Az^{2-}$ | $\Delta E_{p,c-p,a}$<br>(mV) | $i_{p,c}/i_{p,a}$ |
|-----------|------------------|------------------|------------------------------|---------------------------------------------|------------------------------|-------------------|
| 1         | -NH <sub>2</sub> | -NH <sub>2</sub> | -0.66 + -0.66 = -1.32        | -1.64                                       | 118                          | 1.07              |
| This work | -NH <sub>2</sub> | -H               | -0.66 + 0.00 = -0.66         | -1.45                                       | 76                           | 1.02              |
| This work | -H               | -H               | 0.00 + 0.00 = 0.00           | -1.27                                       | 159                          | 1.08              |
| This work | -Cl              | -H               | 0.23 + 0.00 = 0.23           | -1.25                                       | 63                           | 0.98              |
| This work | -Cl              | -Cl              | 0.23 + 0.23 = 0.46           | -1.20                                       | 72                           | 1.09              |
| 2         | -NC              | -H               | 0.49 + 0.00 = 0.49           | -1.16                                       | 170                          | 0.98              |
| 1         | -NC              | -NC              | 0.49 + 0.49 = 0.98           | -1.02                                       | 60                           | 1.0               |

**Table S6.**  $E_{p,c}$  potentials and  $\sigma_p$  parameters for Fig. 5.

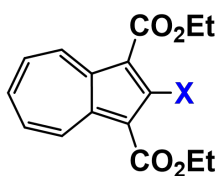

| X                | $\sigma_p(X)$ | $E_{p,c}$ (V)<br>$Az^0 \rightarrow Az^{2-}$ |
|------------------|---------------|---------------------------------------------|
| -NH <sub>2</sub> | -0.66         | -2.16                                       |
| -H               | 0.00          | -1.84                                       |
| -Cl              | 0.23          | -1.79                                       |
| -NC              | 0.49          | -1.58                                       |

## F. X-Ray Crystallography

### F1. Experimental and Refinement Model Description

Table S6 contains crystal data, collection parameters, and refinement criteria for the crystal structure of **3a**. A dark red crystal coated with STP oil was placed on the tip of a Mitigen micromount (MiTeGen, LLC, Ithaca, NY) and X-ray intensity data were measured at low temperature (173(2) K, Oxford Cryosystems desktop cooler, Oxford Cryosystems Ltd., Oxford) with graphite monochromated Mo K $\alpha$  radiation ( $\lambda = 0.71073 \text{ \AA}$ ) on a Rigaku XtaLAB mini diffractometer.<sup>16</sup> The intensity data were corrected for absorption and decay (ChrysAlis PRO). Final cell constants were calculated based on the xyz centroids of 5126 strong reflections from the actual data collection after integration (ChrysAlis PRO). Utilizing Olex2<sup>17</sup>, the structure was solved with SHELXT 2018/2<sup>18</sup> and refined with SHELXL 2018/3<sup>19</sup>. A direct-methods solution identified most of the non-hydrogen atoms from the E-map. Full-matrix least-squares/difference Fourier cycles were performed that located the remaining nonhydrogen atoms. All non-hydrogen atoms were refined with anisotropic displacement parameters. All of the hydrogen atoms were placed in calculated positions and refined in the riding-model approximation with C-H distances = 0.99, 0.98, and 0.95  $\text{\AA}$  for the methylene C-H, methyl C-H, and aromatic C-H, respectively, along with  $U_{\text{iso}}(\text{H}) = k U_{\text{eq}}(\text{C})$ ,  $k = 1.2$  for all C-H except methyl groups where  $k = 1.5$ . CCDC entry 2300779 contains the relevant crystallographic data associated with this article. These data can be accessed free of charge from the Cambridge Crystallographic Data Centre.

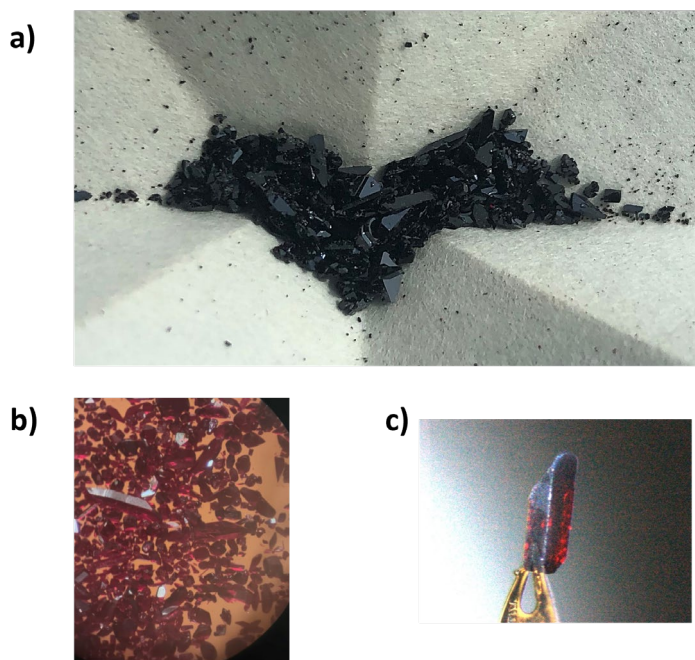

**Figure S21.** a) Bulk crystalline sample of **3a**; b) crystals of **3a** under microscopic amplification; c) crystal of **3a** selected for X-ray diffraction study.

**Table S7.** Crystal data and structure refinement for **3a**.

|                                             |                                                                |
|---------------------------------------------|----------------------------------------------------------------|
| Empirical formula                           | C <sub>32</sub> H <sub>28</sub> Cl <sub>2</sub> O <sub>8</sub> |
| Formula weight                              | 611.44                                                         |
| Temperature/K                               | 173.15                                                         |
| Crystal system                              | triclinic                                                      |
| Space group                                 | P-1 (no. 2)                                                    |
| a/Å                                         | 9.9510(8)                                                      |
| b/Å                                         | 10.5842(9)                                                     |
| c/Å                                         | 14.9945(12)                                                    |
| α/°                                         | 96.395(7)                                                      |
| β/°                                         | 99.389(7)                                                      |
| γ/°                                         | 117.914(8)                                                     |
| Volume/Å <sup>3</sup>                       | 1344.5(2)                                                      |
| Z                                           | 2                                                              |
| ρ <sub>calc</sub> /cm <sup>3</sup>          | 1.51                                                           |
| μ/mm <sup>-1</sup>                          | 0.298                                                          |
| F(000)                                      | 636                                                            |
| Crystal size/mm <sup>3</sup>                | 0.45 × 0.18 × 0.1                                              |
| Radiation                                   | Mo Kα (λ = 0.71073)                                            |
| 2θ range for data collection/°              | 4.46 to 61.016                                                 |
| Index ranges                                | -14 ≤ h ≤ 14, -15 ≤ k ≤ 15, -21 ≤ l ≤ 21                       |
| Reflections collected                       | 18156                                                          |
| Independent reflections                     | 8070 [R <sub>int</sub> = 0.0331, R <sub>sigma</sub> = 0.0471]  |
| Data/restraints/parameters                  | 8070/0/383                                                     |
| Goodness-of-fit on F <sup>2</sup>           | 1.062                                                          |
| Final R indexes [I > 2σ(I)]                 | R <sub>1</sub> = 0.0527, wR <sub>2</sub> = 0.1357              |
| Final R indexes [all data]                  | R <sub>1</sub> = 0.0753, wR <sub>2</sub> = 0.1598              |
| Largest diff. peak/hole / e Å <sup>-3</sup> | 0.49/-0.59                                                     |

**Table S8.** Fractional Atomic Coordinates ( $\times 10^4$ ) and Equivalent Isotropic Displacement Parameters ( $\text{\AA}^2 \times 10^3$ ) for **3a**.  $U_{\text{eq}}$  is defined as 1/3 of the trace of the orthogonalised  $U_{\text{ij}}$  tensor.

| Atom | <i>x</i>    | <i>y</i>   | <i>z</i>    | <i>U</i> (eq) |
|------|-------------|------------|-------------|---------------|
| Cl1  | 14147.7(5)  | 5032.9(5)  | 10952.0(3)  | 31.69(13)     |
| Cl2  | -256.7(7)   | 1553.8(6)  | 3658.4(4)   | 45.64(16)     |
| O6   | 22.4(16)    | -983.3(15) | 3553.0(10)  | 34.8(3)       |
| O4   | 11632.4(16) | 2324.2(16) | 11060.8(10) | 35.5(3)       |
| O2   | 14758.0(16) | 7761.7(15) | 10383.4(9)  | 35.2(3)       |
| O1   | 14189.8(17) | 7421.7(17) | 8855.8(10)  | 38.7(4)       |
| O8   | 2926.4(18)  | 5698.8(16) | 5705.0(10)  | 36.4(3)       |
| O7   | 1193.4(18)  | 4655.7(17) | 4362.5(10)  | 36.8(3)       |
| O3   | 9194.6(18)  | 1439(2)    | 10339.0(14) | 60.2(6)       |
| O5   | 2094(2)     | -1051(2)   | 4219.5(14)  | 63.0(6)       |
| C3   | 11072(2)    | 3543.4(19) | 10007.6(12) | 23.3(3)       |
| C10  | 10120(2)    | 3703.2(19) | 9283.1(11)  | 22.2(3)       |
| C9'  | 3655(2)     | 3383(2)    | 5532.5(12)  | 24.0(3)       |
| C9   | 11093(2)    | 5016.3(19) | 8995.6(11)  | 22.5(3)       |
| C1'  | 2403(2)     | 3420(2)    | 4980.7(12)  | 25.5(4)       |
| C10' | 3414(2)     | 1928(2)    | 5272.5(12)  | 25.4(3)       |
| C4   | 8553(2)     | 2774(2)    | 8914.9(12)  | 25.6(3)       |
| C1   | 12592(2)    | 5637.4(19) | 9570.4(12)  | 23.5(3)       |
| C20  | 2096(2)     | 4623(2)    | 4967.1(12)  | 26.9(4)       |
| C6   | 7833(2)     | 3816(2)    | 7631.1(12)  | 24.4(3)       |
| C2   | 12565(2)    | 4734.1(19) | 10170.7(11) | 22.5(3)       |
| C8   | 10653(2)    | 5578(2)    | 8295.3(12)  | 25.2(3)       |
| C11  | 13916(2)    | 7010(2)    | 9541.7(13)  | 26.6(4)       |
| C6'  | 6468(2)     | 3468(2)    | 6883.0(12)  | 25.8(4)       |
| C14  | 10524(2)    | 2340(2)    | 10467.3(13) | 28.8(4)       |
| C5   | 7563(2)     | 2829(2)    | 8194.0(13)  | 27.8(4)       |
| C8'  | 4906(2)     | 4528(2)    | 6182.0(12)  | 26.8(4)       |
| C7'  | 6130(2)     | 4569(2)    | 6772.4(13)  | 27.9(4)       |
| C7   | 9225(2)     | 5054(2)    | 7694.2(12)  | 26.8(4)       |
| C2'  | 1436(2)     | 2036(2)    | 4415.0(12)  | 26.6(4)       |
| C3'  | 2027(2)     | 1109(2)    | 4568.9(12)  | 27.3(4)       |
| C4'  | 4332(2)     | 1393(2)    | 5656.1(13)  | 29.8(4)       |
| C17  | 1410(2)     | -393(2)    | 4117.4(13)  | 31.7(4)       |
| C5'  | 5648(2)     | 2064(2)    | 6366.1(13)  | 30.8(4)       |
| C18  | -632(2)     | -2462(2)   | 3073.5(14)  | 35.1(4)       |
| C12  | 16192(2)    | 9076(2)    | 10476.7(15) | 37.7(5)       |
| C21  | 2634(3)     | 6901(2)    | 5737.9(16)  | 37.8(5)       |



|     |          |          |             |         |
|-----|----------|----------|-------------|---------|
| C15 | 11162(3) | 1115(2)  | 11500.7(16) | 40.3(5) |
| C13 | 16648(3) | 9880(2)  | 11443.8(16) | 41.7(5) |
| C19 | -2086(3) | -2842(3) | 2394.4(16)  | 44.8(6) |
| C22 | 3811(3)  | 8054(3)  | 6531.4(16)  | 44.8(5) |
| C16 | 12575(3) | 1258(3)  | 12088.9(18) | 45.4(5) |

**Table S9.** Anisotropic Displacement Parameters ( $\text{\AA}^2 \times 10^3$ ) for **3a**. The anisotropic displacement factor exponent takes the form:  $-2\pi^2[h^2a^*2U_{11}+2hka^*b^*U_{12}+\dots]$ .

| Atom | $U_{11}$ | $U_{22}$ | $U_{33}$ | $U_{23}$ | $U_{13}$  | $U_{12}$  |
|------|----------|----------|----------|----------|-----------|-----------|
| C11  | 22.0(2)  | 38.0(3)  | 29.4(2)  | 9.20(18) | -1.12(17) | 12.33(19) |
| C12  | 38.0(3)  | 44.6(3)  | 46.9(3)  | -9.9(2)  | -16.0(2)  | 27.1(2)   |
| O6   | 29.0(7)  | 30.9(7)  | 36.3(7)  | -7.3(6)  | -5.0(6)   | 15.5(6)   |
| O4   | 26.9(7)  | 33.8(7)  | 41.9(8)  | 19.8(6)  | 1.8(6)    | 11.6(6)   |
| O2   | 24.6(7)  | 30.8(7)  | 28.4(7)  | 3.0(5)   | 1.4(5)    | -1.3(6)   |
| O1   | 30.2(7)  | 41.5(8)  | 31.8(7)  | 16.6(6)  | 4.1(6)    | 7.1(6)    |
| O8   | 39.2(8)  | 34.4(8)  | 35.5(7)  | -2.8(6)  | -8.3(6)   | 25.9(7)   |
| O7   | 39.6(8)  | 42.5(8)  | 30.4(7)  | 4.6(6)   | -3.3(6)   | 26.4(7)   |
| O3   | 24.9(8)  | 58.1(11) | 72.2(12) | 43.5(10) | -6.3(8)   | -0.1(7)   |
| O5   | 56.7(11) | 48.6(10) | 71.2(12) | -26.1(9) | -31.3(9)  | 39.2(9)   |
| C3   | 19.7(8)  | 25.4(8)  | 22.0(8)  | 5.4(6)   | 2.7(6)    | 9.7(7)    |
| C10  | 20.6(8)  | 23.5(8)  | 20.4(7)  | 3.1(6)   | 2.8(6)    | 10.1(7)   |
| C9'  | 22.0(8)  | 28.6(9)  | 23.2(8)  | 6.1(6)   | 3.8(6)    | 14.4(7)   |
| C9   | 19.5(8)  | 24.1(8)  | 20.6(7)  | 2.3(6)   | 2.3(6)    | 9.5(6)    |
| C1'  | 23.9(8)  | 29.8(9)  | 22.5(8)  | 3.0(7)   | 1.1(6)    | 15.1(7)   |
| C10' | 23.7(8)  | 29.9(9)  | 21.5(8)  | 2.0(6)   | 1.5(6)    | 14.4(7)   |
| C4   | 19.8(8)  | 26.6(9)  | 26.2(8)  | 6.5(7)   | 2.7(6)    | 9.1(7)    |
| C1   | 21.2(8)  | 25.5(8)  | 21.5(8)  | 4.5(6)   | 2.9(6)    | 10.5(7)   |
| C20  | 25.5(9)  | 30.8(9)  | 25.7(8)  | 5.3(7)   | 3.8(7)    | 16.1(7)   |
| C6   | 21.4(8)  | 29.5(9)  | 21.4(8)  | 1.5(6)   | -0.1(6)   | 14.3(7)   |
| C2   | 18.6(7)  | 27.9(8)  | 19.2(7)  | 2.5(6)   | 0.9(6)    | 11.9(7)   |
| C8   | 23.2(8)  | 24.3(8)  | 24.6(8)  | 4.4(6)   | 1.8(6)    | 10.6(7)   |
| C11  | 20.4(8)  | 28.5(9)  | 27.2(8)  | 4.9(7)   | 1.8(7)    | 10.7(7)   |
| C6'  | 20.9(8)  | 31.8(9)  | 23.1(8)  | 3.9(7)   | 0.5(6)    | 13.6(7)   |
| C14  | 24.9(9)  | 30.9(9)  | 26.6(9)  | 9.9(7)   | 2.8(7)    | 10.8(8)   |
| C5   | 19.2(8)  | 29.1(9)  | 29.2(9)  | 5.3(7)   | 0.8(7)    | 9.3(7)    |
| C8'  | 25.5(9)  | 27.2(9)  | 27.1(8)  | 5.6(7)   | 3.1(7)    | 13.8(7)   |
| C7'  | 25.3(9)  | 28.0(9)  | 26.8(9)  | 3.4(7)   | 0.6(7)    | 12.5(7)   |
| C7   | 25.9(9)  | 30.2(9)  | 24.1(8)  | 7.2(7)   | 2.4(7)    | 14.7(7)   |
| C2'  | 23.7(8)  | 34.5(10) | 20.5(8)  | -0.8(7)  | -2.1(6)   | 17.3(8)   |
| C3'  | 25.9(9)  | 31.0(9)  | 22.9(8)  | -0.7(7)  | -1.7(7)   | 16.3(7)   |

|     |          |          |          |           |          |          |
|-----|----------|----------|----------|-----------|----------|----------|
| C4' | 28.0(9)  | 30.3(9)  | 28.8(9)  | -0.4(7)   | -2.8(7)  | 17.0(8)  |
| C17 | 30.1(10) | 35.6(10) | 27.6(9)  | -1.2(7)   | -2.6(7)  | 19.7(8)  |
| C5' | 28.9(9)  | 33.0(10) | 30.4(9)  | 2.0(7)    | -2.3(7)  | 19.5(8)  |
| C18 | 31.8(10) | 29.7(10) | 33.4(10) | -6.1(8)   | -0.3(8)  | 12.4(8)  |
| C12 | 24.6(9)  | 26.7(10) | 41.6(11) | 4.7(8)    | 4.1(8)   | -1.4(7)  |
| C21 | 39.6(11) | 33.7(10) | 43.6(11) | 1.3(9)    | -0.3(9)  | 25.7(9)  |
| C15 | 35.4(11) | 37.4(11) | 45.5(12) | 25.8(9)   | 6.1(9)   | 13.6(9)  |
| C13 | 35.2(11) | 29.4(10) | 43.3(12) | 1.6(9)    | 0.0(9)   | 6.9(9)   |
| C19 | 29.6(11) | 47.5(13) | 42.3(12) | -11.1(10) | -2.9(9)  | 15.4(10) |
| C22 | 52.2(14) | 36.3(11) | 43.5(12) | -0.8(9)   | -3.0(10) | 26.7(11) |
| C16 | 42.8(13) | 50.7(14) | 50.8(13) | 27.7(11)  | 9.3(10)  | 26.5(11) |

**Table S10.** Bond Lengths for **3a**.

| Atom | Atom | Length (Å) | Atom | Atom | Length (Å) |
|------|------|------------|------|------|------------|
| C11  | C2   | 1.6738(17) | C9   | C8   | 1.372(2)   |
| C12  | C2'  | 1.6817(18) | C1'  | C20  | 1.443(3)   |
| O6   | C17  | 1.306(2)   | C1'  | C2'  | 1.389(2)   |
| O6   | C18  | 1.426(2)   | C10' | C3'  | 1.403(2)   |
| O4   | C14  | 1.308(2)   | C10' | C4'  | 1.368(2)   |
| O4   | C15  | 1.421(2)   | C4   | C5   | 1.365(2)   |
| O2   | C11  | 1.317(2)   | C1   | C2   | 1.379(2)   |
| O2   | C12  | 1.423(2)   | C1   | C11  | 1.445(3)   |
| O1   | C11  | 1.184(2)   | C6   | C6'  | 1.478(2)   |
| O8   | C20  | 1.320(2)   | C6   | C5   | 1.372(3)   |
| O8   | C21  | 1.429(2)   | C6   | C7   | 1.369(3)   |
| O7   | C20  | 1.183(2)   | C8   | C7   | 1.368(2)   |
| O3   | C14  | 1.180(2)   | C6'  | C7'  | 1.374(3)   |
| O5   | C17  | 1.186(2)   | C6'  | C5'  | 1.370(3)   |
| C3   | C10  | 1.400(2)   | C8'  | C7'  | 1.364(2)   |
| C3   | C2   | 1.384(2)   | C2'  | C3'  | 1.381(2)   |
| C3   | C14  | 1.436(3)   | C3'  | C17  | 1.440(3)   |
| C10  | C9   | 1.437(2)   | C4'  | C5'  | 1.363(2)   |
| C10  | C4   | 1.366(2)   | C18  | C19  | 1.475(3)   |
| C9'  | C1'  | 1.398(2)   | C12  | C13  | 1.477(3)   |
| C9'  | C10' | 1.440(3)   | C21  | C22  | 1.470(3)   |
| C9'  | C8'  | 1.376(2)   | C15  | C16  | 1.464(3)   |
| C9   | C1   | 1.391(2)   |      |      |            |

**Table S11.** Bond Angles for **3a**.

| Atom | Atom | Atom | Angle (°)  | Atom | Atom | Atom | Angle (°)  |
|------|------|------|------------|------|------|------|------------|
| C17  | O6   | C18  | 116.59(16) | C3   | C2   | C11  | 125.84(14) |
| C14  | O4   | C15  | 116.42(16) | C1   | C2   | C11  | 123.86(14) |
| C11  | O2   | C12  | 118.03(16) | C1   | C2   | C3   | 110.27(15) |
| C20  | O8   | C21  | 115.34(15) | C7   | C8   | C9   | 130.09(18) |
| C10  | C3   | C14  | 124.08(16) | O2   | C11  | C1   | 110.89(16) |
| C2   | C3   | C10  | 107.09(16) | O1   | C11  | O2   | 124.41(18) |
| C2   | C3   | C14  | 128.83(16) | O1   | C11  | C1   | 124.67(17) |
| C3   | C10  | C9   | 107.57(15) | C7'  | C6'  | C6   | 117.49(16) |
| C4   | C10  | C3   | 126.11(17) | C5'  | C6'  | C6   | 116.41(16) |
| C4   | C10  | C9   | 126.31(16) | C5'  | C6'  | C7'  | 126.10(17) |
| C1'  | C9'  | C10' | 106.88(15) | O4   | C14  | C3   | 114.20(16) |
| C8'  | C9'  | C1'  | 126.74(17) | O3   | C14  | O4   | 121.71(18) |
| C8'  | C9'  | C10' | 126.36(16) | O3   | C14  | C3   | 124.09(18) |
| C1   | C9   | C10  | 107.00(15) | C4   | C5   | C6   | 130.83(18) |
| C8   | C9   | C10  | 127.37(16) | C7'  | C8'  | C9'  | 130.40(18) |
| C8   | C9   | C1   | 125.63(17) | C8'  | C7'  | C6'  | 129.63(18) |
| C9'  | C1'  | C20  | 128.93(16) | C8   | C7   | C6   | 129.28(17) |
| C2'  | C1'  | C9'  | 107.15(16) | C1'  | C2'  | C12  | 123.85(14) |
| C2'  | C1'  | C20  | 123.92(16) | C3'  | C2'  | C12  | 124.74(14) |
| C3'  | C10' | C9'  | 108.38(15) | C3'  | C2'  | C1'  | 111.39(15) |
| C4'  | C10' | C9'  | 126.73(16) | C10' | C3'  | C17  | 124.78(17) |
| C4'  | C10' | C3'  | 124.85(17) | C2'  | C3'  | C10' | 106.19(16) |
| C5   | C4   | C10  | 129.54(18) | C2'  | C3'  | C17  | 129.02(16) |
| C9   | C1   | C11  | 124.96(16) | C5'  | C4'  | C10' | 129.66(18) |
| C2   | C1   | C9   | 108.03(16) | O6   | C17  | C3'  | 114.29(16) |
| C2   | C1   | C11  | 126.99(16) | O5   | C17  | O6   | 121.62(19) |
| O8   | C20  | C1'  | 113.10(15) | O5   | C17  | C3'  | 124.07(18) |
| O7   | C20  | O8   | 122.79(17) | C4'  | C5'  | C6'  | 130.86(18) |
| O7   | C20  | C1'  | 124.11(17) | O6   | C18  | C19  | 107.51(18) |
| C5   | C6   | C6'  | 115.26(16) | O2   | C12  | C13  | 106.15(18) |
| C7   | C6   | C6'  | 118.21(16) | O8   | C21  | C22  | 106.92(17) |
| C7   | C6   | C5   | 126.53(16) | O4   | C15  | C16  | 107.80(18) |

**Table S12.** Torsion angles for **3a**.

| A   | B   | C   | D    | Angle (°)   | A  | B  | C   | D  | Angle (°)   |
|-----|-----|-----|------|-------------|----|----|-----|----|-------------|
| C12 | C2' | C3' | C10' | -177.69(15) | C2 | C3 | C10 | C9 | 1.27(19)    |
| C12 | C2' | C3' | C17  | 2.8(3)      | C2 | C3 | C10 | C4 | -179.00(17) |

|      |      |      |      |             |     |      |      |     |             |
|------|------|------|------|-------------|-----|------|------|-----|-------------|
| C3   | C10  | C9   | C1   | -1.75(19)   | C2  | C3   | C14  | O4  | -6.6(3)     |
| C3   | C10  | C9   | C8   | 178.71(17)  | C2  | C3   | C14  | O3  | 172.8(2)    |
| C3   | C10  | C4   | C5   | -177.65(19) | C2  | C1   | C11  | O2  | -38.2(3)    |
| C10  | C3   | C2   | C11  | -178.22(13) | C2  | C1   | C11  | O1  | 143.4(2)    |
| C10  | C3   | C2   | C1   | -0.3(2)     | C8  | C9   | C1   | C2  | -178.90(17) |
| C10  | C3   | C14  | O4   | 173.50(17)  | C8  | C9   | C1   | C11 | 2.4(3)      |
| C10  | C3   | C14  | O3   | -7.2(3)     | C11 | O2   | C12  | C13 | 164.69(18)  |
| C10  | C9   | C1   | C2   | 1.56(19)    | C11 | C1   | C2   | C11 | -4.2(3)     |
| C10  | C9   | C1   | C11  | -177.14(16) | C11 | C1   | C2   | C3  | 177.86(17)  |
| C10  | C9   | C8   | C7   | -0.8(3)     | C6' | C6   | C5   | C4  | 176.97(19)  |
| C10  | C4   | C5   | C6   | -0.1(4)     | C6' | C6   | C7   | C8  | -177.36(18) |
| C9'  | C1'  | C20  | O8   | -15.9(3)    | C14 | O4   | C15  | C16 | 176.6(2)    |
| C9'  | C1'  | C20  | O7   | 164.2(2)    | C14 | C3   | C10  | C9  | -178.81(16) |
| C9'  | C1'  | C2'  | C12  | 177.79(14)  | C14 | C3   | C10  | C4  | 0.9(3)      |
| C9'  | C1'  | C2'  | C3'  | -0.9(2)     | C14 | C3   | C2   | C11 | 1.9(3)      |
| C9'  | C10' | C3'  | C2'  | -0.7(2)     | C14 | C3   | C2   | C1  | 179.77(18)  |
| C9'  | C10' | C3'  | C17  | 178.83(18)  | C5  | C6   | C6'  | C7' | 131.49(19)  |
| C9'  | C10' | C4'  | C5'  | 1.2(4)      | C5  | C6   | C6'  | C5' | -48.1(2)    |
| C9'  | C8'  | C7'  | C6'  | 0.3(4)      | C5  | C6   | C7   | C8  | 1.9(3)      |
| C9   | C10  | C4   | C5   | 2.0(3)      | C8' | C9'  | C1'  | C20 | -1.5(3)     |
| C9   | C1   | C2   | C11  | 177.16(13)  | C8' | C9'  | C1'  | C2' | 178.79(18)  |
| C9   | C1   | C2   | C3   | -0.8(2)     | C8' | C9'  | C10' | C3' | -178.18(18) |
| C9   | C1   | C11  | O2   | 140.24(18)  | C8' | C9'  | C10' | C4' | 3.8(3)      |
| C9   | C1   | C11  | O1   | -38.1(3)    | C7' | C6'  | C5'  | C4' | -1.6(4)     |
| C9   | C8   | C7   | C6   | 0.3(3)      | C7  | C6   | C6'  | C7' | -49.2(2)    |
| C1'  | C9'  | C10' | C3'  | 0.2(2)      | C7  | C6   | C6'  | C5' | 131.22(19)  |
| C1'  | C9'  | C10' | C4'  | -177.86(19) | C7  | C6   | C5   | C4  | -2.3(3)     |
| C1'  | C9'  | C8'  | C7'  | 176.8(2)    | C2' | C1'  | C20  | O8  | 163.84(18)  |
| C1'  | C2'  | C3'  | C10' | 1.0(2)      | C2' | C1'  | C20  | O7  | -16.0(3)    |
| C1'  | C2'  | C3'  | C17  | -178.5(2)   | C2' | C3'  | C17  | O6  | -7.5(3)     |
| C10' | C9'  | C1'  | C20  | -179.78(18) | C2' | C3'  | C17  | O5  | 170.7(2)    |
| C10' | C9'  | C1'  | C2'  | 0.5(2)      | C3' | C10' | C4'  | C5' | -176.5(2)   |
| C10' | C9'  | C8'  | C7'  | -5.1(3)     | C4' | C10' | C3'  | C2' | 177.35(19)  |
| C10' | C3'  | C17  | O6   | 173.09(18)  | C4' | C10' | C3'  | C17 | -3.1(3)     |
| C10' | C3'  | C17  | O5   | -8.7(4)     | C17 | O6   | C18  | C19 | -172.87(19) |
| C10' | C4'  | C5'  | C6'  | -2.4(4)     | C5' | C6'  | C7'  | C8' | 3.8(3)      |
| C4   | C10  | C9   | C1   | 178.51(17)  | C18 | O6   | C17  | O5  | 0.6(3)      |
| C4   | C10  | C9   | C8   | -1.0(3)     | C18 | O6   | C17  | C3' | 178.81(18)  |
| C1   | C9   | C8   | C7   | 179.71(18)  | C12 | O2   | C11  | O1  | -7.7(3)     |
| C20  | O8   | C21  | C22  | -172.2(2)   | C12 | O2   | C11  | C1  | 173.93(17)  |
| C20  | C1'  | C2'  | C12  | -2.0(3)     | C21 | O8   | C20  | O7  | 1.5(3)      |

|     |     |     |     |             |     |    |     |     |             |
|-----|-----|-----|-----|-------------|-----|----|-----|-----|-------------|
| C20 | C1' | C2' | C3' | 179.28(17)  | C21 | O8 | C20 | C1' | -178.34(17) |
| C6  | C6' | C7' | C8' | -175.81(19) | C15 | O4 | C14 | O3  | 3.7(3)      |
| C6  | C6' | C5' | C4' | 178.0(2)    | C15 | O4 | C14 | C3  | -176.95(18) |

**Table S13.** Hydrogen Atom Coordinates ( $\text{\AA} \times 10^4$ ) and Isotropic Displacement Parameters ( $\text{\AA}^2 \times 10^3$ ) for **3a**.

| Atom | <i>x</i> | <i>y</i> | <i>z</i> | U(eq) |
|------|----------|----------|----------|-------|
| H4   | 8083.72  | 1971.73  | 9203.09  | 31    |
| H8   | 11465.52 | 6470.39  | 8215.23  | 30    |
| H5   | 6508.64  | 2053.13  | 8059.23  | 33    |
| H8'  | 4917.46  | 5435.67  | 6226.19  | 32    |
| H7'  | 6858.68  | 5496.67  | 7165.78  | 34    |
| H7   | 9195.17  | 5631.57  | 7257.96  | 32    |
| H4'  | 4004.4   | 407.04   | 5387.54  | 36    |
| H5'  | 6067.13  | 1455.61  | 6530.02  | 37    |
| H18A | -865.64  | -3121.87 | 3514.65  | 42    |
| H18B | 118.59   | -2565.2  | 2753.78  | 42    |
| H12A | 16045.11 | 9665.68  | 10042.01 | 45    |
| H12B | 17009.56 | 8852.14  | 10345.32 | 45    |
| H21A | 1562.86  | 6593.25  | 5816.74  | 45    |
| H21B | 2728.21  | 7262.33  | 5157.47  | 45    |
| H15A | 10616.06 | 185.21   | 11030.85 | 48    |
| H15B | 10434.97 | 1113.52  | 11879.94 | 48    |
| H13A | 15870.31 | 10162.98 | 11547.97 | 62    |
| H13B | 17679.04 | 10759.15 | 11560.44 | 62    |
| H13C | 16698.87 | 9249.54  | 11864.78 | 62    |
| H19A | -1827.47 | -2253.42 | 1923.49  | 67    |
| H19B | -2775.27 | -2642.44 | 2710.89  | 67    |
| H19C | -2621.16 | -3883.77 | 2097.53  | 67    |
| H22A | 4856.7   | 8417.18  | 6415.96  | 67    |
| H22B | 3774.34  | 7653.63  | 7091.11  | 67    |
| H22C | 3585.38  | 8861.45  | 6616.12  | 67    |
| H16A | 13310.24 | 1311.52  | 11712.30 | 68    |
| H16B | 12289.61 | 406.56   | 12373.48 | 68    |
| H16C | 13070.83 | 2151.39  | 12574.48 | 68    |

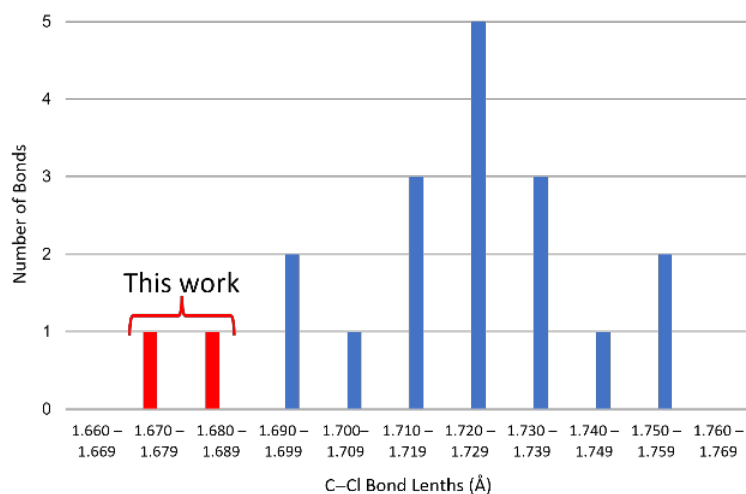

**Figure S22.** Distribution of the C–Cl bond distances for chloroazulenes featuring Cl-substitution at the five-membered ring of their azulenic scaffold: this work plus 17 hits (Table S14) in CCDC, version 5.45 (Nov. 2023), accessed on Nov. 15, 2023.

**Table S14.** X-ray crystallographically characterized chloroazulenes represented in Fig. S22.

| Molecular structure | $d(\text{C}^2\text{-Cl})$ , Å | CCDC identifier |
|---------------------|-------------------------------|-----------------|
|                     | 1.674(2)<br>1.682(2)          | This work       |
|                     | 1.7117 (17)                   | HOMRAE          |
|                     | 1.709(2)                      | AYIDIX          |
|                     | 1.714(4)                      | XIGPOU          |
|                     | 1.71(2)<br>1.72(2)            | FAQGUA          |

|                                                                                     |                                                                            |               |
|-------------------------------------------------------------------------------------|----------------------------------------------------------------------------|---------------|
| 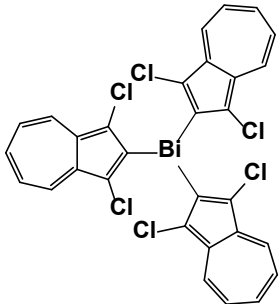   | <p>1.75(2)<br/>1.75(2)<br/>1.69(2)<br/>1.69(2)<br/>1.74(2)<br/>1.73(2)</p> | <p>FAQGOU</p> |
|    | <p>1.7237(17)<br/>1.7234(17)</p>                                           | <p>UROCAI</p> |
|   | <p>1.722(4)</p>                                                            | <p>XOWQAD</p> |
|  | <p>1.730(2)</p>                                                            | <p>XOWQEH</p> |
|  | <p>1.726(3)</p>                                                            | <p>XOXCOE</p> |

|                                                                                   |          |        |
|-----------------------------------------------------------------------------------|----------|--------|
| 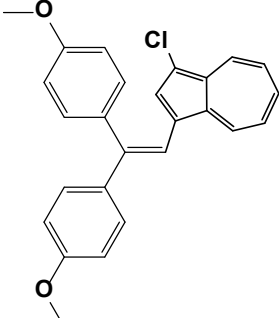 | 1.732(3) | EZITEM |
|-----------------------------------------------------------------------------------|----------|--------|

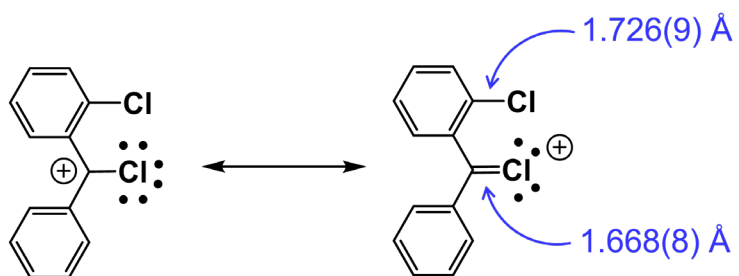

**Figure S23.** The chlorodiphenylmethyl cation X-ray crystallographically characterized by Laube et al.<sup>20</sup>



# References

- (1) T.R. Maher, A.D. Spaeth, B.M. Neal, C.L. Berrie, W.H. Thompson, V.W. Day and M.V. Barybin, *J. Am. Chem. Soc.*, 2010, **132**, 15924-15926.
- (2) P.T. Connelly, J.C. Applegate, D.A. Maldonado, M.K. Okeowo, W.C. Henke, A.G. Oliver, C.L. Berrie and M.V. Barybin, *Dalton Trans.*, 2023, **52**, 11419-11426.
- (3) M. Makosza, P. W. Osinski, and S. Ostrowski, *Pol. J. Chem.*, 2001, **75**, 275-281.
- (4) I. Suzuka and M. Yasunami, Japan JP2008285435, 2008.
- (5) T. Nozoe, S. Seto and S. Matsumura, *Bull. Chem. Soc. Jpn.*, 1962, **35**, 1990-1998.
- (6) D.L. DuBose, R.E. Robinson, T.C. Holovics, D.R. Moody, E.C. Weintrob, C.L. Berrie, and M.V. Barybin, *Langmuir*, 2006, **22**, 4599-4606.
- (7) S. Ito, T. Okujima and N. Morita, *J. Chem. Soc., Perkin Trans. 1*, 2002, **16**, 1896-1905.
- (8) B. Hou, Z. Zhou, C. Yu, X.-S. Xue, J. Zhang, X. Yang, J. Li, C. Ge, J. Wang and X. Gao, *ACS Macro Lett.*, 2022, **11**, 680-686.
- (9) H. Xin, C. Ge, X. Yang, H. Gao, X. Yang and X. Gao, *Chem. Sci.*, 2016, **7**, 6701-6705.
- (10) K. Kurotobi, H. Tabata, M. Miyauchi, T. Murafuji and Y. Sugihara, *Synthesis*, 2002, **8**, 1013-1016.
- (11) E. Epifanovsky *et al.*, *J. Chem. Phys.*, 2021, **155**, 084801.
- (12) A.D. Becke, *J. Chem. Phys.*, 1993, **98**, 5648-5652.
- (13) T.H. Dunning Jr., *J. Chem. Phys.* 1989, **90**, 1007-1023.
- (14) E. Cancès, B. Mennucci and J. Tomasi, *J. Chem. Phys.*, 1997, **107**, 3032-3041.
- (15) Q. Wu and T. Van Voorhis, *J. Chem. Theory Comput.*, 2006, **2**, 765-777.
- (16) Rigaku Oxford Diffraction (2022). CrysAlis PRO. Rigaku Oxford Diffraction, Tokyo, Japan.
- (17) O.V. Dolomanov, L.J. Bourhis, R.J. Gildea, J.A.K. Howard and H.J. Puschmann, *Appl. Cryst.* 2009, **42**, 339-341.
- (18) G.M. Sheldrick, *Acta Cryst.*, 2015, **A71**, 3-8.
- (19) G.M. Sheldrick, *Acta Cryst.*, 2015, **C71**, 3-8.
- (20) T. Laube, E. Bannwart, and S. Hollenstein, *J. Am. Chem. Soc.*, 1993, **115**, 1731-1733.
